# Supplementary material for: Neurosyphilis: Still prevalent and overlooked in an at risk population
Source: PubMed Central journal article supplement (PMC7540903; doi:10.1371/journal.pone.0238617), 2020-10-07
Supplement: pone.0238617.s003.pdf [file pone.0238617.s003.pdf]

# PLOS ONE

## Neurosyphilis: Still Prevalent and Overlooked in an At Risk Population

--Manuscript Draft--

|                               |                                                                                                                                                                                                                                                                                                                                                                                                                                                                                                                                                                                                                                                                                                                                                                                                                                                                                                                                                                                                                                                                                                                                                                                                                                                                                                                                                                                                                                                                                                                                                                                                                                                                                                                                                                                                                                                                                                                                                                                                                                |
|-------------------------------|--------------------------------------------------------------------------------------------------------------------------------------------------------------------------------------------------------------------------------------------------------------------------------------------------------------------------------------------------------------------------------------------------------------------------------------------------------------------------------------------------------------------------------------------------------------------------------------------------------------------------------------------------------------------------------------------------------------------------------------------------------------------------------------------------------------------------------------------------------------------------------------------------------------------------------------------------------------------------------------------------------------------------------------------------------------------------------------------------------------------------------------------------------------------------------------------------------------------------------------------------------------------------------------------------------------------------------------------------------------------------------------------------------------------------------------------------------------------------------------------------------------------------------------------------------------------------------------------------------------------------------------------------------------------------------------------------------------------------------------------------------------------------------------------------------------------------------------------------------------------------------------------------------------------------------------------------------------------------------------------------------------------------------|
| <b>Manuscript Number:</b>     | PONE-D-20-18019R1                                                                                                                                                                                                                                                                                                                                                                                                                                                                                                                                                                                                                                                                                                                                                                                                                                                                                                                                                                                                                                                                                                                                                                                                                                                                                                                                                                                                                                                                                                                                                                                                                                                                                                                                                                                                                                                                                                                                                                                                              |
| <b>Article Type:</b>          | Research Article                                                                                                                                                                                                                                                                                                                                                                                                                                                                                                                                                                                                                                                                                                                                                                                                                                                                                                                                                                                                                                                                                                                                                                                                                                                                                                                                                                                                                                                                                                                                                                                                                                                                                                                                                                                                                                                                                                                                                                                                               |
| <b>Full Title:</b>            | Neurosyphilis: Still Prevalent and Overlooked in an At Risk Population                                                                                                                                                                                                                                                                                                                                                                                                                                                                                                                                                                                                                                                                                                                                                                                                                                                                                                                                                                                                                                                                                                                                                                                                                                                                                                                                                                                                                                                                                                                                                                                                                                                                                                                                                                                                                                                                                                                                                         |
| <b>Short Title:</b>           | Neurosyphilis: Still Prevalent and Overlooked in an At Risk Population                                                                                                                                                                                                                                                                                                                                                                                                                                                                                                                                                                                                                                                                                                                                                                                                                                                                                                                                                                                                                                                                                                                                                                                                                                                                                                                                                                                                                                                                                                                                                                                                                                                                                                                                                                                                                                                                                                                                                         |
| <b>Corresponding Author:</b>  | Prashanth Sriram Ramachandran<br>University of California San Francisco<br>San Francisco, CA UNITED STATES                                                                                                                                                                                                                                                                                                                                                                                                                                                                                                                                                                                                                                                                                                                                                                                                                                                                                                                                                                                                                                                                                                                                                                                                                                                                                                                                                                                                                                                                                                                                                                                                                                                                                                                                                                                                                                                                                                                     |
| <b>Keywords:</b>              | Neurosyphilis<br>Syphilis<br>Epidemiology                                                                                                                                                                                                                                                                                                                                                                                                                                                                                                                                                                                                                                                                                                                                                                                                                                                                                                                                                                                                                                                                                                                                                                                                                                                                                                                                                                                                                                                                                                                                                                                                                                                                                                                                                                                                                                                                                                                                                                                      |
| <b>Abstract:</b>              | <p><b>Background:</b> Neurosyphilis (NS) presents with a variety of clinical syndromes that can be attributed to other aetiologies due to difficulties in its diagnosis. We reviewed all cases of NS from the “Top End” of the Australian Northern Territory over a ten-year period to assess incidence, clinical and laboratory manifestations.</p> <p><b>Methods:</b> Patient data (2007-2016) were extracted from hospital records, centralised laboratory data and Northern Territory Centre for Disease Control records. Clinical records of patients with clinically suspected NS were reviewed. A diagnosis of NS was made based on the 2014 US CDC criteria. Results were also recategorized based on the 2018 US CDC criteria.</p> <p><b>Results:</b> The population of the “Top End” is 185,570, of whom 26.2% are Indigenous. A positive TPPA was recorded in 3126 individuals. A total of 75 (2.4%) of TPPA positive patients had a lumbar puncture (LP), of whom 25 (35%) were diagnosed with NS (9 definite, 16 probable). Dementia was the most common manifestation (58.3%), followed by epilepsy (16.7%), psychosis (12.5%), tabes dorsalis (12.5%) and meningovascular syphilis (8.3%). 63% of probable NS cases were not treated appropriately due to a negative CSF VDRL. Despite increased specificity of the 2018 US CDC criteria, 70% of patient in the probable NS group were not treated appropriately. The overall annual incidence [95%CI] of NS was 2.47[1.28–4.31] per 100 000py in the Indigenous population and 0.95[0.50–1.62] in the non-Indigenous population (rate ratio=2.60 [1.19–5.70];p= 0.017).</p> <p><b>Conclusion:</b> Neurosyphilis is frequently reported in the NT, particularly in Indigenous populations. Disturbingly, 60% of probable neurosyphilis patients based on the 2014 criteria, and 70% based on the 2018 criteria with were not treated appropriately. It is critical that clinicians should be aware of the diagnosis of NS and treat patients appropriately.</p> |
| <b>Order of Authors:</b>      | <p>Prashanth Sriram Ramachandran</p> <p>Rob W Baird</p> <p>Peter Markey</p> <p>Sally Singleton</p> <p>Michael Lowe</p> <p>Bart J Currie</p> <p>James N Burrow</p> <p>Ric N Price</p>                                                                                                                                                                                                                                                                                                                                                                                                                                                                                                                                                                                                                                                                                                                                                                                                                                                                                                                                                                                                                                                                                                                                                                                                                                                                                                                                                                                                                                                                                                                                                                                                                                                                                                                                                                                                                                           |
| <b>Opposed Reviewers:</b>     |                                                                                                                                                                                                                                                                                                                                                                                                                                                                                                                                                                                                                                                                                                                                                                                                                                                                                                                                                                                                                                                                                                                                                                                                                                                                                                                                                                                                                                                                                                                                                                                                                                                                                                                                                                                                                                                                                                                                                                                                                                |
| <b>Response to Reviewers:</b> | <p>The rate of lumbar puncture was 2.4% - do you know how this compares with other countries ?</p> <p>Thank you for this excellent suggestion. Unfortunately, it is not clear after reviewing the literature what LP rates were in other countries. As we one of our methods of screening for NS patients was by reviewing all LP performed in the region we were able to arrive</p>                                                                                                                                                                                                                                                                                                                                                                                                                                                                                                                                                                                                                                                                                                                                                                                                                                                                                                                                                                                                                                                                                                                                                                                                                                                                                                                                                                                                                                                                                                                                                                                                                                           |

at those figures. Other studies have either determined NS through chart reviews, referrals to tertiary centers or reporting to their local CDC. These cases have already met criteria for NS. It is unclear from these studies how many patients had an LP for a query of NS but did not meet criteria, and therefore not diagnosed with NS.

Is there a take home message for practicing clinicians, given the low rate of appropriate treatment ?

We have added a line to the conclusion to try address this. Line 386

Could you add a line or two telling us what you think the limitations are of your study, please ?

We have added a paragraph explaining the limitations of the study, including the difficulties in making a definitive diagnosis of NS and our reliance on mostly retrospective data. Line 373

The authors estimate incidence rates in their population. While they comment on the risk of overestimate in their discussion due to the inclusion of probable cases, they should also comment on the possibility that these are underestimates (at least using the diagnostic criteria that have been employed). Neurosyphilis is often asymptomatic or not considered in the differential diagnosis. Unless the entire population was screened by anti-treponemal antibody, one really does not know the true prevalence of infection.

We agree that this is an important point. We have now raised the issues in the discussion along with the comments regarding asymptomatic cases. This is on line 280 of the discussion.

The authors state that the incidence of syphilis declined significantly following the introduction of penicillin. While this is true, contact tracing also played a significant role in the decline in incidence in the U.S. as case rates began falling long before the widespread institution of penicillin.

Thank you for this addition and something we have now mentioned with appropriate referencing on line 90

The increased incidence in the indigenous population, presumably individuals in a lower socioeconomic group relative to the white population, parallels the experience in the U.S. where rates of syphilis is substantially higher in the African-American and Hispanic populations.

Yes, this is indeed true, the Australian Indigenous population are individuals who have a considerably lower socioeconomic background compared to Whites, with poorer health outcomes. We have added an additional line regarding this in our discussion (line 313).

Two of their patients were HIV-infected. Can they state what percentage of their patients were men who have sex with men among both the indigenous and non-indigenous populations in their study?

Unfortunately, we do not have that data as it was not consistently or clearly documented in the medical records. It was not available to us from the data provided from the CDC either.

Were there not any asymptomatic neurosyphilis cases? If not, why not? Also, can the authors identify whether the neurosyphilis manifestations were early or late manifestations of the infection. Whereas dementia, tabes, and psychosis are typically late manifestations (tertiary syphilis), meningitis, seizures and uveitis are often seen with secondary syphilis, particularly, in the HIV infected population.

There were no cases of asymptomatic NS, which was likely due to our methodology of screening cases based on LPs performed, all of who had neurological symptoms. It also likely relates to the practice of not consistently testing for NS with an LP in patients

|                                                                                                                                                                                                                                                                                                                                                                                                                                        |                                                                                                                                                                                                                                                                                                                                                                                                                                                                                                                                                                                                                                                                                                                                                                                                                                                                                                                                                                                                                                                                                                                                                                                                                                                                                                                                                                                                                                                                                                                                                                                                                                                                                                                                                                                                                                                                                                                                                                                                                                                                                                                                                                                                                                                                                                                                                                                                                                                                                                                                                                                                                                                                                                                                                                                                                                                                                                                                                                                                                                                         |
|----------------------------------------------------------------------------------------------------------------------------------------------------------------------------------------------------------------------------------------------------------------------------------------------------------------------------------------------------------------------------------------------------------------------------------------|---------------------------------------------------------------------------------------------------------------------------------------------------------------------------------------------------------------------------------------------------------------------------------------------------------------------------------------------------------------------------------------------------------------------------------------------------------------------------------------------------------------------------------------------------------------------------------------------------------------------------------------------------------------------------------------------------------------------------------------------------------------------------------------------------------------------------------------------------------------------------------------------------------------------------------------------------------------------------------------------------------------------------------------------------------------------------------------------------------------------------------------------------------------------------------------------------------------------------------------------------------------------------------------------------------------------------------------------------------------------------------------------------------------------------------------------------------------------------------------------------------------------------------------------------------------------------------------------------------------------------------------------------------------------------------------------------------------------------------------------------------------------------------------------------------------------------------------------------------------------------------------------------------------------------------------------------------------------------------------------------------------------------------------------------------------------------------------------------------------------------------------------------------------------------------------------------------------------------------------------------------------------------------------------------------------------------------------------------------------------------------------------------------------------------------------------------------------------------------------------------------------------------------------------------------------------------------------------------------------------------------------------------------------------------------------------------------------------------------------------------------------------------------------------------------------------------------------------------------------------------------------------------------------------------------------------------------------------------------------------------------------------------------------------------------|
|                                                                                                                                                                                                                                                                                                                                                                                                                                        | <p>with syphilis that fail to have a four-fold decrease in RPR despite treatment. There is probably a much higher prevalence of asymptomatic cases that we have failed to detect. This has been added to the discussion (line 282) as well as the results section (line 222). We have categorized cases into early and late manifestations and added it to the results section (line 220), 79% of cases were late manifestations.</p> <p>How comfortable are the authors in attributing the neurological manifestations to syphilis? After all, “a man can have as many diseases as he damn well pleases.” If the clinicians caring for these patients felt comfortable that there were better explanations for their neurological manifestations might that not explain why those with “probable neurosyphilis” were not treated?</p> <p>This is an excellent point that was raised amongst our group. We have added our thoughts regarding this in the discussion (line 340), specifically around the issue of dementia, which is a common condition in the general population. If the clinician felt that the cause of dementia was due to a more common or likely cause then they may not have treated a diagnosis of probable NS. As we do not have in-depth cognitive testing results on our patient cohort, it is difficult for us to say that there was not another dementing syndrome. Further prospective studies are planned to address this.</p> <p>“the test carries a high sensitivity and low sensitivity” (not “now”) line 129</p> <p>Thank you, correction made</p> <p>How do the authors explain the apparent profound decline in syphilis in the indigenous population between 2007 and 2015 with a nadir in 2013, a year that the incidence in the non-indigenous increased?</p> <p>The vast majority of cases between 2007-2015 were late latent cases of syphilis in both the Indigenous and non-Indigenous population. These cases were on the decline in the indigenous population, which we believe was in part due to the work by the CDC, though this is difficult to say in retrospect. The small rise in 2013 in the non-indigenous population is in late latent cases as well, though we are not sure why there was a rise. The sharp increase in cases from 2013 onwards are all new cases of syphilis in the Indigenous population, with late latent cases remaining stable in both groups. We have added a table with a breakdown of the raw numbers as a supplementary table for additional clarity.</p> <p>How does the application of the 2018 CDC criteria change the numbers with respect to the percentage of probably neurosyphilis in which there was a failure to treat?</p> <p>Thank you for this suggestion as it was not something we had thought to look at. In fact with the 2018 CDC criteria only 3/10 cases received IV BP and 3 cases received IM benzathine. This is less than with the 2014 criteria. We have added these findings to the abstract and discussion section (line 74 &amp; 369).</p> |
| <p><b>Additional Information:</b></p>                                                                                                                                                                                                                                                                                                                                                                                                  |                                                                                                                                                                                                                                                                                                                                                                                                                                                                                                                                                                                                                                                                                                                                                                                                                                                                                                                                                                                                                                                                                                                                                                                                                                                                                                                                                                                                                                                                                                                                                                                                                                                                                                                                                                                                                                                                                                                                                                                                                                                                                                                                                                                                                                                                                                                                                                                                                                                                                                                                                                                                                                                                                                                                                                                                                                                                                                                                                                                                                                                         |
| <p><b>Question</b></p>                                                                                                                                                                                                                                                                                                                                                                                                                 | <p><b>Response</b></p>                                                                                                                                                                                                                                                                                                                                                                                                                                                                                                                                                                                                                                                                                                                                                                                                                                                                                                                                                                                                                                                                                                                                                                                                                                                                                                                                                                                                                                                                                                                                                                                                                                                                                                                                                                                                                                                                                                                                                                                                                                                                                                                                                                                                                                                                                                                                                                                                                                                                                                                                                                                                                                                                                                                                                                                                                                                                                                                                                                                                                                  |
| <p><b>Financial Disclosure</b></p> <p>Enter a financial disclosure statement that describes the sources of funding for the work included in this submission. Review the <a href="#">submission guidelines</a> for detailed requirements. View published research articles from <a href="#">PLOS ONE</a> for specific examples.</p> <p>This statement is required for submission and <b>will appear in the published article</b> if</p> | <p>No</p>                                                                                                                                                                                                                                                                                                                                                                                                                                                                                                                                                                                                                                                                                                                                                                                                                                                                                                                                                                                                                                                                                                                                                                                                                                                                                                                                                                                                                                                                                                                                                                                                                                                                                                                                                                                                                                                                                                                                                                                                                                                                                                                                                                                                                                                                                                                                                                                                                                                                                                                                                                                                                                                                                                                                                                                                                                                                                                                                                                                                                                               |

the submission is accepted. Please make sure it is accurate.

**Unfunded studies**

Enter: *The author(s) received no specific funding for this work.*

**Funded studies**

Enter a statement with the following details:

- Initials of the authors who received each award
- Grant numbers awarded to each author
- The full name of each funder
- URL of each funder website
- Did the sponsors or funders play any role in the study design, data collection and analysis, decision to publish, or preparation of the manuscript?
- **NO** - Include this sentence at the end of your statement: *The funders had no role in study design, data collection and analysis, decision to publish, or preparation of the manuscript.*
- **YES** - Specify the role(s) played.

\* typeset

**Competing Interests**

Use the instructions below to enter a competing interest statement for this submission. On behalf of all authors, disclose any [competing interests](#) that could be perceived to bias this work—acknowledging all financial support and any other relevant financial or non-financial competing interests.

This statement **will appear in the published article** if the submission is accepted. Please make sure it is accurate. View published research articles from [PLOS ONE](#) for specific examples.

No

**NO authors have competing interests**

Enter: *The authors have declared that no competing interests exist.*

**Authors with competing interests**

Enter competing interest details beginning with this statement:

*I have read the journal's policy and the authors of this manuscript have the following competing interests: [insert competing interests here]*

\* typeset

**Ethics Statement**

Enter an ethics statement for this submission. This statement is required if the study involved:

- Human participants
- Human specimens or tissue
- Vertebrate animals or cephalopods
- Vertebrate embryos or tissues
- Field research

Write "N/A" if the submission does not require an ethics statement.

General guidance is provided below. Consult the [submission guidelines](#) for detailed instructions. **Make sure that all information entered here is included in the Methods section of the manuscript.**

HUMAN RESEARCH ETHICS COMMITTEE  
of Northern Territory Department of Health  
and Menzies School of Health Research:  
HREC 2016-2633  
Approval was gained to conduct this study via written consent

**Format for specific study types**

**Human Subject Research (involving human participants and/or tissue)**

- Give the name of the institutional review board or ethics committee that approved the study
- Include the approval number and/or a statement indicating approval of this research
- Indicate the form of consent obtained (written/oral) or the reason that consent was not obtained (e.g. the data were analyzed anonymously)

**Animal Research (involving vertebrate animals, embryos or tissues)**

- Provide the name of the Institutional Animal Care and Use Committee (IACUC) or other relevant ethics board that reviewed the study protocol, and indicate whether they approved this research or granted a formal waiver of ethical approval
- Include an approval number if one was obtained
- If the study involved *non-human primates*, add *additional details* about animal welfare and steps taken to ameliorate suffering
- If anesthesia, euthanasia, or any kind of animal sacrifice is part of the study, include briefly which substances and/or methods were applied

**Field Research**

Include the following details if this study involves the collection of plant, animal, or other materials from a natural setting:

- Field permit number
- Name of the institution or relevant body that granted permission

**Data Availability**

Authors are required to make all data underlying the findings described fully available, without restriction, and from the time of publication. PLOS allows rare exceptions to address legal and ethical concerns. See the [PLOS Data Policy](#) and [FAQ](#) for detailed information.

Yes - all data are fully available without restriction

A Data Availability Statement describing where the data can be found is required at submission. Your answers to this question constitute the Data Availability Statement and **will be published in the article**, if accepted.

**Important:** Stating 'data available on request from the author' is not sufficient. If your data are only available upon request, select 'No' for the first question and explain your exceptional situation in the text box.

Do the authors confirm that all data underlying the findings described in their manuscript are fully available without restriction?

**Describe where the data may be found in full sentences. If you are copying our sample text, replace any instances of XXX with the appropriate details.**

- If the data are **held or will be held in a public repository**, include URLs, accession numbers or DOIs. If this information will only be available after acceptance, indicate this by ticking the box below. For example: *All XXX files are available from the XXX database (accession number(s) XXX, XXX).*
- If the data are all contained **within the manuscript and/or Supporting Information files**, enter the following: *All relevant data are within the manuscript and its Supporting Information files.*
- If neither of these applies but you are able to provide **details of access elsewhere**, with or without limitations, please do so. For example:

*Data cannot be shared publicly because of [XXX]. Data are available from the XXX Institutional Data Access / Ethics Committee (contact via XXX) for researchers who meet the criteria for access to confidential data.*

*The data underlying the results presented in the study are available from (include the name of the third party*

Supplementary table provided with data collected

*and contact information or URL).*

- This text is appropriate if the data are owned by a third party and authors do not have permission to share the data.

\* typeset

Additional data availability information:



Dear Dr Bob Taylor,

Re: *Neurosyphilis: Still Prevalent and Overlooked in an At Risk Population*

We would like to thank you for reviewing our manuscript for PLOS ONE. The suggestions made by yourself and the reviewer have been addressed and we feel that they have further improved the manuscript. Of note, after re-categorizing cases with the new 2018 US CDC NS criteria, 70% of patients in the probable NS group still did not receive appropriate therapy, indicating significant underdiagnosis and undertreatment despite the improved specificity of the new 2018 criteria. We have tried to highlight the recurring theme of under treatment as one of the take home message for clinicians. We have also added a further supplementary table with raw data on regional syphilis cases over the last 10 years.

The authors received no specific funding for this work. The authors have declared that no competing interests exist.

We again thank you for your consideration of our paper.

Your sincerely

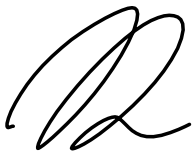

Dr Prashanth Ramachandran

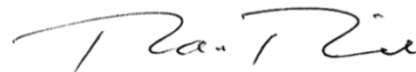

Professor Ric Price

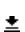

1                    **Neurosyphilis: Still Prevalent and Overlooked in an At Risk Population**

2    **Authors**

3    Prashanth S Ramachandran <sup>1</sup>

4    Rob W Baird<sup>2</sup>

5    Peter Markey<sup>1,3</sup>

6    Sally Singleton<sup>3</sup>

7    Michael Lowe<sup>1</sup>

8    Bart J Currie<sup>1,4</sup>

9    James N Burrow <sup>1</sup>

10   Ric N Price <sup>1,4,5</sup>

11

12    1 Division of Medicine, Royal Darwin Hospital, Darwin, NT, Australia;

13    2 Territory Pathology, Department of Health, Darwin NT.

14    3 Centre for Disease Control, Northern Territory, Australia

15    4 Global and Tropical Health Division, Menzies School of Health Research, Charles Darwin

16    University, Darwin, NT, Australia;

17    5 Centre for Tropical Medicine and Global Health, Nuffield Department of Medicine, University

18    of Oxford, Oxford, UK

19

20    **Keywords:** Neurosyphilis, Syphilis, Epidemiology

21

22    **Corresponding Author:**

23    Ric N Price

24    Global and Tropical Health Division, Menzies School of Health Research, Charles Darwin

25    University, Darwin, NT, Australia;

26    Centre for Tropical Medicine and Global Health, Nuffield Department of Medicine, University

27 Email: [Ric.Price@menzies.edu.au](mailto:Ric.Price@menzies.edu.au)

28 **Alternate Corresponding Author:**

29 Prashanth S Ramachandran

30 Division of Medicine, Royal Darwin Hospital, Darwin, NT, Australia

31 Email: [prashanth.ramachandran@ucsf.edu](mailto:prashanth.ramachandran@ucsf.edu)

32

33 **Article Summary:**

34 We assessed the incidence of neurosyphilis (NS) in Northern Australia, where there is currently

35 an outbreak of syphilis. There was a higher incidence of NS in the Indigenous population using

36 both the US-CDC 2014 criteria and the recent 2018 US-CDC criteria. Neurosyphilis was

37 underdiagnosed and undertreated by clinician 

38

39

40

41

42

43

44

45

46

47 **Abstract**

48 **Background:** Neurosyphilis (NS) presents with a variety of clinical syndromes that can be  
49 attributed to other aetiologies due to difficulties in its diagnosis. We reviewed all cases of NS  
50 from the “Top End” of the Australian Northern Territory over a ten-year period to assess  
51 incidence, clinical and laboratory manifestations.

52 **Methods:** Patient data (2007-2016) were extracted from hospital records, centralised laboratory  
53 data and Northern Territory Centre for Disease Control records. Clinical records of patients with  
54 clinically suspected NS were reviewed. A diagnosis of NS was made based on the 2014 US  
55 CDC criteria. Results were also recategorized based on the 2018 US CDC criteria.

56 **Results:** The population of the “Top End” is 185,570, of whom 26.2% are Indigenous. A positive  
57 TPPA was recorded in 3126 individuals. A total of 75 (2.4%) of TPPA positive patients had a  
58 lumbar puncture (LP), of whom 25 (35%) were diagnosed with NS (9 definite, 16 probable).  
59 Dementia was the most common manifestation (58.3%), followed by epilepsy (16.7%),  
60 psychosis (12.5%), tabes dorsalis (12.5%) and meningovascular syphilis (8.3%). 63% of  
61 probable NS cases were not treated appropriately due to a negative CSF VDRL. Despite  
62 increased specificity of the 2018 US CDC criteria, 70% of patients in the probable NS group were  
63 not treated appropriately. The overall annual incidence [95%CI] of NS was 2.47[1.28–4.31] per  
64 100 000py in the Indigenous population and 0.95[0.50–1.62] in the non-Indigenous population  
65 (rate ratio=2.60 [1.19–5.70];p= 0.017).

66 **Conclusion:** Neurosyphilis is frequently reported in the NT, particularly in Indigenous  
67 populations. Disturbingly, 60% of probable neurosyphilis patients based on the 2014 criteria,  
68 and 70% based on the 2018 criteria with were not treated appropriately. It is critical that  
69 clinicians should be aware of the diagnosis of NS and treat patients appropriately.

70

71 **Introduction**

72 Syphilis continues to cause a major burden of disease due to its systemic manifestations and  
73 long-term neurological sequelae. After the introduction of contact tracing, followed by penicillin,  
74 the incidence of syphilis declined significantly, falling from 447 per 100 000-person years (py) in  
75 the United States in 1947 to 11.2 per 100 000py in 2000(1, 2). However since the turn of the  
76 millennium, the global incidence has increased markedly, more than doubling in at risk  
77 populations in North America, Australia and Europe (1, 3, 4). In 2014 alone there were an  
78 estimated 6 million new cases of syphilis (5) the majority occurring in Africa and South East  
79 Asia(6). The risk of syphilis is expected to be particularly high in certain ethnic groups,  
80 indigenous populations and men having sex with men(7).

81 Many countries have instituted mandatory reporting of all new cases of syphilis, to ensure early  
82 detection of outbreaks and to guide patient management and public health interventions.  
83 However, neurosyphilis (NS) is not a reportable disease as a separate entity and therefore  
84 epidemiological data are sparse. In the antibiotic era, several studies have estimated the  
85 incidence of NS to range from 0.08 to 2.2 per 100 000py(8-11). However, the true incidence of  
86 NS is difficult to quantify due to frequent misdiagnoses, arising from a paucity of accurate  
87 microbiological tests, protean manifestations of the disease and varied clinical diagnostic  
88 criteria(12, 13).

89 In the tropical northern region of the Northern Territory (NT) of Australia (the “Top End”), which  
90 has had a centralised syphilis register and programmatic support since 2005, syphilis rates had  
91 been decreasing until 2013. However, in 2011 an epidemic of syphilis commenced in the State  
92 of Queensland which soon spread eastward to Central Australia, then the Top End of the  
93 Northern Territory by mid 2013 and subsequently to Western Australia. The tri-State epidemic  
94 continues in 2020. To quantify the impact of NS on the region, we undertook a review of all

95 cases of NS from the “Top End” over a ten-year period (2007-2016) to assess its incidence and  
96 associated clinical and laboratory manifestations.

97

## 98 **Methods**

### 99 **Study Design**

100 We conducted a retrospective (2007 – 2015) and prospective (2016) multicentre cohort study of  
101 NS, in the Top End of the Northern Territory of Australia. In 2007 the population of the ‘Top End’  
102 was 168,036 rising to 194,882 in 2016. The corresponding Indigenous population rose from  
103 45,765 (27.2% of population) to 52,101 (26.7% of population). The population at the midpoint  
104 of the ten-year study period was 185,570, of whom 48,632 (26.2%) were Indigenous. The  
105 midpoint population over the ten-year period was used for incidence calculations.

106

107 Between 2007 and 2016, all patients presenting to one of the three district hospitals servicing this  
108 region were eligible for inclusion in the study if they fulfilled the US Centres for Disease Control  
109 (US CDC) criteria for NS, comprising of a clinical syndrome consistent with NS and cerebrospinal  
110 fluid (CSF) changes(14). Our initial analysis was based on the 2014 US CDC criteria for NS,  
111 which has a high sensitivity, allowing the capture of all cases, however, these criteria lack  
112 specificity, most notably when serological tests are negative (15). The revised 2018 US CDC NS  
113 criteria were published during manuscript preparation and were included into subsequent  
114 epidemiological analysis (Table 1)(16).

115 Clinical syndromes consistent with NS were defined as meningitis with or without cranial nerve  
116 abnormalities, meningovascular disease, dementia (general paresis) and tabes dorsalis, and  
117 isolated presentations of epilepsy, psychosis, ocular and otic disease. Late manifestations of NS  
118 were categorized as dementia, tabes dorsalis and psychosis. Early manifestations of NS were  
119 categorized as meningitis, meningovascular disease, ocular disease, otic disease and isolated

120 epilepsy. As per the US CDC 2014 NS criteria, a definite diagnosis of NS was defined as at least  
121 one clinical syndrome compatible with NS with a positive serum *Treponema pallidum* particle  
122 agglutination assay (TPPA) test and a positive CSF Venereal Disease Research Laboratory  
123 (VDRL). Probable NS was defined as a clinical syndrome suggestive of NS, a positive serum  
124 TPPA test, an elevated CSF white cell count (WCC) >5 cell/microL and/or CSF protein >0.45mg/L  
125 with no other cause found (Table 2). Possible NS was defined as a patient who was treated for  
126 NS due to high suspicion, but who did not meet CDC criteria for lack of a CSF examination, or a  
127 diagnosis based on an alternate criterion.

128 CSF treponemal tests (TPPA, FTA-Ab)  not included in either the 2014 or 2018 CDC criteria.  
129 The test carries a high sensitivity but low specificity, and is often used to rule out NS when  
130 negative. However due to its poor negative predictive value, some argue that it should not be  
131 used when a patient's pre-test probability of NS is high (17). We did not use either CSF TPPA or  
132 FTA-Ab in our selection criteria as it was not part of the US CDC 2014 criteria.

133

#### 134 **Data sources**

135 Patients were identified and matched using three separate databases; i) The Northern Territory  
136 (NT) Centre for Disease Control notifications of syphilis, including classification (either less than  
137 2 years duration or greater than 2 years or unknown duration) and register of prior treatment; ii)  
138 Hospital discharge coding from each of the three district hospitals; and iii) laboratory records of  
139 syphilis serology testing.

140 Demographic and clinical information from all eligible patients were gathered from the electronic  
141 medical records and the clinical classification of NS, its treatment and outcomes recorded in a  
142 standardised database using Excel (v16.19, Microsoft). Patients' hardcopy medical records were  
143 retrieved when further information was required. Regional population data were obtained from the  
144 Top End Health Department data which maintains yearly Indigenous and Non-Indigenous  
145 population data for the region. NT CDC data was used for confirmation of treatment history and

146 serological titre response. NT CDC data for new cases of syphilis were divided into three  
147 categories during collection: Indigenous, non-Indigenous and unknown.

148 The Top End syphilis diagnostic algorithm uses serum TPPA treponemal testing as the initial test  
149 for syphilis and if positive, an RPR is done. CSF for suspected NS patients is analysed by VDRL,  
150 TPPA and FTA-A alongside biochemistry analysis and microscopy.

151

### 152 **Statistical analysis**

153 All statistical analyses and graphs were generated using Graphpad Prism(v7, San Diego,  
154 California). Normally distributed data were compared using Student's t-test, and non-parametric  
155 comparisons were made using the Mann-Whitney U test. Proportions were examined using  $\chi^2$   
156 with Yates' correction or Fisher's exact test. Correlations were assessed using the Pearson test  
157 for correlated proportions for normal distributed variables and the Spearman rank test for non-  
158 normal distributed variables. Rate ratios and 95% confidence intervals were determined using  
159 Confidence Interval Analysis (vs 2.2.0).

### 160 **Ethics**

161 Ethical approval was granted by the Human Research Ethics Committee of the Northern Territory  
162 Department of Health and Menzies School of Health Research (HREC 2016-2633)

163

### 164 **Results**

165 Between January 2007 and December 2016, 3126 (1.6%) individuals in the Top End tested for  
166 syphilis serology were TPPA positive. Of these there were 1135 confirmed new cases of syphilis  
167 (Figure 1), of whom 789 (69.5%) were in Indigenous, 330 (29%) in non-Indigenous individuals  
168 and 18 (1.5%) had no classification available. The corresponding incidence of new cases of  
169 syphilis was 162.24 per 100,000 person years (py) [95% CI 151.12 - 173.97] in the Indigenous  
170 population and 24.10 per 100,00py [95% CI 21.57 – 26.85] in the non-Indigenous population



171 (Rate Ratio (RR) = 6.73 [95%CI 5.92 – 7.65]; p<0.0001). The number of new cases rose from a  
172 mean of 105.8 per year between 2007 and 2011 to 121.2 per year between 2012 and 2016. The  
173 overall incidence of newly diagnosed syphilis cases was 61.16 [95% CI 57.66 – 64.83] per  
174 100,000py.

175

### 176 **Neurosyphilis**

177 Of the 3126 TPPA positive individuals, 75 (2.4%) underwent lumbar puncture. Of the 44 (59%)  
178 patients with CSF abnormalities, 16/44 (31%) had an alternate diagnosis or a history that was  
179 not suggestive of NS. Of the remaining 28 patients with clinical history consistent with NS 9  
180 (32%) had a definite diagnosis of NS, 16 (57%) had a probable diagnosis of NS and 3 (11%)  
181 had possible NS. The nineteen patients with alternate diagnosis and possible NS were excluded  
182 from further analysis (Figure 2).

183 Of the 25 patients with definite or probable NS, 19 (76%) were male, 12 (48%) were Indigenous  
184 and 2(8%) were HIV positive. The median age of these patients was 64 years (range: 32 to 97).  
185 The overall incidence of definite or probable NS was 1.37 [95% CI 0.87 – 1.99] per 100,000py ,  
186 the incidence being 2.47 [95%CI 1.28 – 4.31] per 100 000py in the Indigenous population and  
187 0.95 [95%CI 0.50 – 1.62] per 100,000py in the non-Indigenous population (rate ratio=2.60 [1.19  
188 – 5.70]; p= 0.017). When only patients with definite NS were included, the incidence was 0.49  
189 [95% CI 0.22 –0.92] per 100,000py, with no significant difference between the Indigenous (0.62  
190 [95% CI 0.13 – 1.80] per 100,000py) and non-Indigenous (0.44 [95% CI 0.16 – 0.95] per  
191 100,000py) populations p=0.63. The rate of NS per case of syphilis in the Indigenous population  
192 was 12/789 (1.52%) and 13/360 (3.6%) (rate ratio=0.39 [0.18 – 0.84]; p=0.016).

### 193 **Clinical Manifestations**

194 Clinical data were available for 24 of the 25 patients with definite or probable NS. Dementia was  
195 present in 14 (58.3%) of patients, seizures in 4 (16.7%), tabes dorsalis in 3 (12.5%), psychosis  
196 in 3 (12.5%), meningovascular disease in 2 (8.3%) and ocular involvement (panuveitis) in 1  
197 (4.2%) patient. Three patients had more than one clinical manifestation of NS; Figure 3 and  
198 Table 2. There were no cases of meningitis or otic NS. It was not possible to characterise the  
199 dementia syndrome or severity from the clinical records. Overall 79% (19/24) cases were late  
200 manifestations of NS and 62% (5/8) of definite cases were late manifestations of the disease.  
201 No patients with asymptomatic NS were identified.

### 202 **Laboratory results**

203 CSF VDRL was positive in all cases of definite NS and absent otherwise. CSF TPPA was  
204 positive in 89% (8/9) of those with definite NS and 18.8% (3/16) with probable NS. CSF FTA  
205 was only tested in 20 patients and was positive in all (8/8) patients with a definite diagnosis and  
206 33% (4/12) of patients with a probable diagnosis. Only 2 patients in the probable group had  
207 positive CSF serology for both TPPA and FTA (Table 2).

208 In total 28.0% (7/25) patients with definite or probable NS had a raised WCC in their CSF with a  
209 median count of 21 cell/microL (range 7 to 45 cell/microL), which was predominantly  
210 lymphocytic. In patients with a definite NS diagnosis WCC was elevated in 55.6% (5/9) of  
211 cases, compared to 12.5% (2/16) in patients with a probable diagnosis ;  $p= 0.144$ . The CSF  
212 protein was elevated in 92% (24/25) of patients (median 0.74 mg/L, range 0.49-1.37mg/L).

213 Two patients with definite NS had borderline CSF results: with a CSF protein of 0.49mg/L and  
214 0.5mg/L respectively with no pleocytosis. One patient with definite NS had a normal CSF protein  
215 with CSF WCC of 5 cell/microL which should be considered as a normal CSF. Two of these  
216 patients had dementia, there were no clinical data available for the third.

217 Serum RPR was reactive in all (9/9) patients with a definite diagnosis of NS and 62.5% (10/16)  
218 of those with a probable diagnosis, with a significantly higher titre in those with definite NS;  
219  $p < 0.0001$  (Table 2).

220

### 221 **Treatment**

222 Prior to a diagnosis of NS, two patients with definite NS had been treated for late latent syphilis  
223 with intramuscular benzathine penicillin without a pertinent four-fold decrease in their RPR. Nine  
224 (56.3%) of the patients with probable NS had also received prior intramuscular benzathine  
225 penicillin for latent syphilis of whom 4 (44.4%) did not have an appropriate four-fold decrease in  
226 their RPR titre. This can be attributed to either treatment failure or potential re-infection. Of the 6  
227 patients in the probable group who had a non-reactive serum RPR at the time of NS diagnosis,  
228 data regarding prior treatment through the NT CDC was available for only 5. Of those 5 patients,  
229 3 had no documented prior history of treatment for syphilis

230 All patients with definitive NS were treated with the recommended regimen of 14-15 days of IV  
231 benzylpenicillin, but only 37.5% (6/16) of those with probable NS were treated with IV benzyl  
232 penicillin. Of the 10 patients who were not treated appropriately, four were treated for late latent  
233 syphilis (weekly IM benzathine penicillin for 3 weeks), three of whom had dementia with the only  
234 mildly elevated CSF protein (range 0.57-0.74 mg/L). One patient treated for latent syphilis had  
235 signs and symptoms of tabes dorsalis and a CSF WCC 21 cell/microL and a negative CSF  
236 VDRL.

237 Only 2 of the 25 patients with definite or probable NS had a repeat lumbar puncture, one of  
238 whom was a 60-year-old who had presented with psychosis and received appropriate therapy  
239 for NS, but subsequently required re-treatment as there was still an elevated CSF VDRL without  
240 a 4 fold decrease.

241 **Discussion**

242 Despite significant public health endeavours, syphilis continues to increase in incidence and  
243 exert significant morbidity in at risk populations. Our analysis highlights that between 2007 and  
244 2016, the incidence of syphilis in the Top End of Australia was 61.16 per 100,000 py with an  
245 associated incidence of NS, based on the 2014 US CDC criteria, of 1.37 per 100,000 py. The  
246 rate of syphilis was almost 7-fold higher in the Indigenous population than in the non-Indigenous  
247 population and this was associated with a 2.5 fold higher rate of NS. However, the rate of NS  
248 per case of syphilis was significantly lower in the Indigenous population in comparison. This is  
249 likely due to the stringent follow up and treatment by the NT CDC of Indigenous cases  
250 compared to non-Indigenous cases. This has likely limited the duration of syphilis exposure in  
251 this community and prevented the development of NS.

252 Since two thirds of the cases were defined as probable diagnoses we may have overestimated  
253 the true risk of NS however even when these patients were excluded the incidence of definitive  
254 NS in the Top End was 0.49 per 100,000py, approximately 2.5 - 5 fold higher than that reported  
255 from UK and Denmark. We may also have underestimated the true incidence. Our  
256 methodology screened patients based on those who underwent lumbar punctures, all of whom  
257 had presented with neurological symptoms. This approach would have failed to capture  
258 asymptomatic NS patients, and thus underestimated the true incidence. It is not current practice  
259 to perform an LP for patients with syphilis who do not have a four-fold decline in serum RPR  
260 despite adequate treatment and this may have missed detection of asymptomatic cases  Our  
261 proposed incidence of NS also assumes that clinicians have considered the diagnosis of NS in  
262 all patients presenting with suspicious symptoms and sent appropriate testing.

263

264 In view of the rising number of cases of early syphilis it is likely that NS will increase over the  
265 coming decades. Our study is unique in applying almost complete capture of reported cases  
266 from the region. It is also the first study to detail the incidence and clinical characteristics of NS  
267 in any region of Australia. Similar to previous studies in the US that demonstrate racial  
268 disparities with the rates of syphilis between Whites, Blacks and Hispanic persons, our study  
269 demonstrates marked ethnic disparities in the incidence of both syphilis and neurosyphilis (7,  
270 18), which further undermines the already poor health outcomes and lower life expectancy of  
271 Indigenous Australians.(18)

272 The diagnosis of NS is challenging, since there is no gold standard microbiological assay and  
273 varying, non-specific diagnostic criteria. Alarmingly more than half of the patients in our study  
274 with a probable diagnosis of NS did not receive appropriate treatment. Both false negative and  
275 false positive diagnoses contribute to the misdiagnosis of NS. The former arises from the  
276 misconception that a negative CSF VDRL has a high negative predictive value for ruling out NS.  
277 Whilst CSF VDRL is highly specific, its sensitivity is between (30 and 70%)(19). A negative CSF  
278 VDRL should therefore not dissuade a clinician from the potential diagnosis of NS. Although  
279 CSF treponemal tests have higher sensitivity, their negative predictive value is dependent on  
280 the pre-test probability of NS(17). The high prevalence of syphilis in the Top End and the high  
281 level of suspicion prompting an LP and investigation for NS increases the pre-test probability of  
282 NS in our cohort. In this context a negative CSF treponemal test cannot be relied upon to rule  
283 out NS. Although polymerase chain reaction (PCR) carries a high sensitivity and specificity for  
284 other specific neuroinfectious diseases (HSV, enterovirus, etc), the utility of PCR has never  
285 been shown for NS (20).

286 False positive diagnoses of NS can arise from the low specificity and high sensitivity of the US  
287 CDC 2014 diagnostic criteria, in which the only CSF abnormality required for a diagnosis of NS  
288 is an elevated CSF protein. US CDC Guidelines recommend that NS should be treated with

289 intravenous benzylpenicillin administered 4 hourly for 15 days(14). We conjecture that there is  
290 either a reluctance to treat an already very demented patient or ambivalence over the  
291 significance of a mildly elevated protein as the only abnormal CSF finding. The clinical  
292 experience of many clinicians is that a mildly elevated CSF protein (0.46-0.55 mg/L) as an  
293 isolated finding is of little clinical utility.(21) We were unable to extract data on the cognitive  
294 profile of our patients with dementia and it is therefore not possible to differentiate between  
295 patients with probable NS who truly had dementia related to NS or due to another aetiology.  
296 Given the increasing prevalence of dementia in the general community, the treating clinicians  
297 may have decided not to treat for probable NS as another cause of dementia was more likely.

298 During the preparation of the manuscript, the US CDC released revised diagnostic criteria which  
299 included an additional requirement that a reactive serum RPR result was needed for a diagnosis  
300 of definite and probable NS. A four-fold decrease in RPR titres suggests a treatment response  
301 in syphilis, however RPR titres can fall and normalise even without treatment. Previous studies  
302 have demonstrated that in patients with definite NS, the serum RPR is almost always reactive,  
303 but approximately 10% of patients with probable NS have a non-reactive serum RPR(22). In our  
304 cohort all patients with definite NS had a reactive serum RPR, but over a third of patients with  
305 probable NS group did not have a reactive serum, of whom three had no history of prior syphilis  
306 treatment and only had an elevated CSF protein. According to more stringent criteria these  
307 serum RPR negative patients would be considered false positives. Although some of these  
308 patients may have been correctly categorized as not having NS, the diagnosis in those who  
309 have never received any form of prior syphilis treatment is unclear – they could have potentially  
310 normalised serum RPR overtime and thus constitute false negative diagnosis of NS. This group  
311 is likely to constitute a very small overall percentage of NS cases and a drop in the US CDC  
312 2018 criteria's sensitivity may be appropriate for the compensatory increase in specificity. The  
313 US CDC 2018 criteria [case](#)s demonstrate that a large number that were previously categorized

314 as probable NS with only an elevated CSF protein, likely did not have NS as they were no  
315 longer considered probable under the new criteria. We recategorized our cohort into both the  
316 2014 and 2018 NS criteria, (Figure 4, Supplementary file 1) to demonstrate the differences in  
317 incidence between the two criteria. With the new 2018 CDC NS criteria, only 3/10 (30%) of  
318 probable NS cases were treated appropriately with IV benzylpenicillin for 2 weeks. 3 patients  
319 received 3 courses of IM benzathine penicillin and the remainder of patients received no  
320 treatment.

321 Our study has several limitations. Although we attempted to capture all cases of syphilis and  
322 NS searching multiple databases, given the uncertainty of the diagnosis and our reliance on LP  
323 and clinical suspicion, we may have either over- or under- estimated the true burden of disease.  
324 Furthermore whilst we included prospective data collection the majority of the data were  
325 gathered retrospectively and we were unable to document detailed phenotypes of many of the  
326 patients from the medical notes.

327

## 328 **Conclusion**

329 Our study highlights the ongoing difficulties with the diagnosis and management of NS. Despite  
330 these challenges, there continues to be significant disparities between Indigenous and non-  
331 Indigenous Australians in the incidence of syphilis and NS. Similar to other studies, the key  
332 dilemma is whether patients with probable NS truly have the disease and would benefit from  
333 appropriate treatment (23). Until the advent of a new and accurate assay, NS will continue to be  
334 a complex and difficult disease to diagnose and manage. A large proportion of patients with  
335 probable NS were not diagnosed or treated appropriately. Whilst the new 2018 CDC NS criteria  
336 improves the specificity of probable NS, it is critical that clinicians should be aware of the  
337 diagnosis and treat patients appropriately.

338

339

340

341

342

343

344

345

346

347

348

349

350

351

352

353

354

355

356 **References**



357 1. Center for Disease Control. Sexually Transmitted Disease Surveillance 2017. 2017 [cited 2018  
358 11.17.2018]; Available from: <https://www.cdc.gov/std/stats17/tables/1.htm>.

359 2. Green T, Talbot MD, Morton RS. The control of syphilis, a contemporary problem: a historical  
360 perspective. *Sexually Transmitted Infections*. 2001 2001-06-01 00:00:00;77:214-7.

361 3. Welfare AGAloHa. Incidence of sexually transmissible infections and blood-borne viruses. 2018  
362 [cited 2018 11.17.2018]; Available from: <https://www.aihw.gov.au/reports/australias-health/australias-health-2018/contents/indicators-of-australias-health/sexually-transmissible-infections-bloodborne-virus>.

363  
364

365 4. ECDC. European Centre for Disease Prevention and Control. Annual Epidemiological Report 2016  
366 – Syphilis. 2016 [cited 2018 11.17.2018]; Available from:  
367 <http://ecdc.europa.eu/en/healthtopics/Syphilis/Pages/Annual-epidemiological-report.aspx>.

368 5. Newman L, Rowley J, Vander Hoorn S, Wijesooriya NS, Unemo M, Low N, et al. Global Estimates  
369 of the Prevalence and Incidence of Four Curable Sexually Transmitted Infections in 2012 Based on  
370 Systematic Review and Global Reporting. *PLoS One*. 2015;10(12):e0143304.

371 6. World Health Organization. Global incidence and prevalence of selected curable sexually  
372 transmitted diseases—2008. 2012 [1.3.2018]; Available from:  
373 [http://apps.who.int/iris/bitstream/10665/75181/1/9789241503839\\_eng.pdf?ua=1](http://apps.who.int/iris/bitstream/10665/75181/1/9789241503839_eng.pdf?ua=1).

374 7. Center for Disease Control. STDs in Racial and Ethnic Minorities. 2016 [cited 2018 11.17.2018];  
375 Available from: <https://www.cdc.gov/std/stats16/minorities.htm>.

376 8. Alani S, Millac P. Neurosyphilis in the Leicester area. *Postgrad Med J*. 1982 Nov;58(685):685-7.

377 9. Conde-Sendin MA, Amela-Peris R, Aladro-Benito Y, Maroto AA. Current clinical spectrum of  
378 neurosyphilis in immunocompetent patients. *Eur Neurol*. 2004;52(1):29-35.

379 10. Danielsen AG, Weismann K, Jorgensen BB, Heidenheim M, Fugleholm AM. Incidence, clinical  
380 presentation and treatment of neurosyphilis in Denmark 1980-1997. *Acta Derm Venereol*.  
381 2004;84(6):459-62.

382 11. Nordenbo AM, Sorensen PS. The incidence and clinical presentation of neurosyphilis in Greater  
383 Copenhagen 1974 through 1978. *Acta Neurol Scand*. 1981 Apr;63(4):237-46.

384 12. Tang W, Huang S, Chen L, Yang L, Tucker JD, Zheng H, et al. Late Neurosyphilis and Tertiary  
385 Syphilis in Guangdong Province, China: Results from a Cross-sectional Study. *Sci Rep*. 2017 Mar  
386 24;7:45339.

387 13. Yanhua W, Haishan S, Le H, Xiaomei Z, Xinru C, Ling L, et al. Clinical and neuropsychological  
388 characteristics of general paresis misdiagnosed as primary psychiatric disease. *BMC Psychiatry*. 2016 Jul  
389 11;16:230.

390 14. Workowski KA, Bolan GA, Centers for Disease C, Prevention. Sexually transmitted diseases  
391 treatment guidelines, 2015. *MMWR Recomm Rep*. 2015 Jun 5;64(RR-03):1-137.

392 15. Center for Disease Control. Syphilis (*Treponema pallidum*) 2014 Case Definition. 2019 [cited  
393 2019 05/03/2018]; Available from: <https://www.cdc.gov/nndss/conditions/syphilis/case-definition/2014/>.

394  
395 16. Center for Disease Control. Syphilis (*Treponema pallidum*) 2018 Case Definition. 2019. [cited  
396 07/09/2019]; Available from: <https://www.cdc.gov/nndss/conditions/syphilis/case-definition/2018/>

397 17. Harding AS, Ghanem KG. The performance of cerebrospinal fluid treponemal-specific antibody  
398 tests in neurosyphilis: a systematic review. *Sex Transm Dis*. 2012 Apr;39(4):291-7.

399 18. Zhao Y, You J, Wright J, Guthridge SL, Lee AH. Health inequity in the Northern Territory,  
400 Australia. *Int J Equity Health*. 2013 Sep 13;12:79.

401 19. Hooshmand H, Escobar MR, Kopf SW. Neurosyphilis. A study of 241 patients. *JAMA*. 1972  
402 Feb;219(6):726-9.

403 20. Marks M, Lawrence D, Kositz C, Mabey D. Diagnostic performance of PCR assays for the  
404 diagnosis of neurosyphilis: a systematic review. *Sex Transm Infect*. 2018 Jul 30.

405 21. Breiner A, Moher D, Brooks J, Cheng W, Hegen H, Deisenhammer F, et al. Adult CSF total protein  
406 upper reference limits should be age-partitioned and significantly higher than 0.45 g/L: a systematic  
407 review. *J Neurol*. 2019 Jan 8.

408 22. Tuddenham S, Obeng C, Ghanem KG. Neurosyphilis and ophthalmic syphilis in persons with  
409 negative rapid plasma reagin and positive treponemal antibody test results. *Sex Transm Dis*. 2015  
410 Jun;42(6):347-9.

411 23. Vanhaecke C, Grange P, Benhaddou N, Blanche P, Salmon D, Parize P, et al. Clinical and  
412 Biological Characteristics of 40 Patients With Neurosyphilis and Evaluation of *Treponema pallidum*  
413 Nested Polymerase Chain Reaction in Cerebrospinal Fluid Samples. *Clin Infect Dis*. 2016 Nov  
414 1;63(9):1180-6.

415

416

417

418

419

420

421

422

423

424

425

426

427

428

429 Table 1: Diagnostic Criteria for Neurosyphilis

|                    | <b>US CDC 2014<br/>Diagnostic<br/>Criteria for<br/>NS</b> | <b>US CDC 2018<br/>Diagnostic<br/>Criteria for NS</b> |
|--------------------|-----------------------------------------------------------|-------------------------------------------------------|
| <b>Definite NS</b> | Serum TPPA<br>positive                                    | Serum TPPA<br>positive                                |
|                    | CSF VDRL<br>positive                                      | <b>Serum reactive<br/>RPR</b>                         |
|                    |                                                           | CSF VDRL<br>positive                                  |
|                    |                                                           |                                                       |
| <b>Probable NS</b> |                                                           | <b>Serum reactive<br/>RPR</b>                         |
|                    | Serum TPPA<br>positive                                    | Serum TPPA<br>positive                                |
|                    | CSF WCC > 5<br>cell/microL                                | CSF WCC > 5<br>cell/microL                            |
|                    | or                                                        | or                                                    |
|                    | CSF protein ><br>0.5 mg/L                                 | CSF protein ><br>0.5 mg/L                             |

430  
431  
432  
433  
434  
435  
436  
437  
438  
439  
440

Table 2: Clinical and laboratory characteristics based on 2014 US CDC Diagnostic Criteria

|                                                    | <b>Definite</b>                                       | <b>Probable</b>                                     | <b>Total</b>                                               |
|----------------------------------------------------|-------------------------------------------------------|-----------------------------------------------------|------------------------------------------------------------|
|                                                    | 9                                                     | 16                                                  | 25                                                         |
| Male                                               | 8                                                     | 11                                                  | 19                                                         |
| Indigenous                                         | 3                                                     | 9                                                   | 11                                                         |
| HIV                                                | 2                                                     | 0                                                   | 2                                                          |
| <b>Clinical Diagnoses</b>                          | n = 8                                                 | n = 16                                              | n = 24                                                     |
| Meningitis                                         | 0                                                     | 0                                                   | 0                                                          |
| Ocular                                             | 1                                                     | 0                                                   | 1                                                          |
| Meningovascular                                    | 1                                                     | 1                                                   | 2                                                          |
| Dementia                                           | 4                                                     | 10                                                  | 14                                                         |
| Psychosis                                          | 1                                                     | 2                                                   | 3                                                          |
| Tabes Dorsalis                                     | 1                                                     | 2                                                   | 3                                                          |
| Seizures                                           | 2                                                     | 2                                                   | 4                                                          |
| <b>Laboratory</b>                                  |                                                       |                                                     |                                                            |
| Number of reactive serum RPR                       | 9                                                     | 10                                                  | 19                                                         |
| Median RPR titre                                   | 1:128 (1:2 - 1:512)                                   | 1:4 (1:1 - 1:16)                                    | 1:8 (1:1 – 1:512)                                          |
| Number of CSF examinations                         | 9                                                     | 16                                                  | 25                                                         |
| Number of positive CSF VDRL ( $\geq$ 1:1)          | 9                                                     | 0                                                   | 9                                                          |
| Number of reactive CSF TPPA                        | 8                                                     | 2                                                   | 10                                                         |
| Number of reactive CSF FTA                         | 8                                                     | 4                                                   | 12                                                         |
| Number with high WCC in CSF (WCC > 5 cell/microl)  | 5<br>(median 26cell/microl,<br>range 7-45cell/microl) | 2<br>(range 10-<br>21cell/microl)                   | 7<br>(median 21<br>cell/microl, range<br>7-45 cell/microl) |
| Number with high CSF Protein (Protein > 0.50 mg/L) | 6<br>(median 1.08mg/L,<br>range 0.68-1.37mg/L)        | 16<br>(median<br>0.725mg/L, range<br>0.57-1.37mg/L) | 22<br>(median 0.77mg/L,<br>range 0.57-<br>1.37mg/L)        |
| <b>Management</b>                                  | n = 9                                                 | n = 16                                              | n = 25                                                     |
| Treatment for NS                                   | 9                                                     | 6                                                   | 15                                                         |

442

443

444

445

446

447 Table 3: Incidence of NS in the NT based on different criteria

448

|                                                                        | <b>US CDC 2014</b>           | <b>US CDC 2018</b>                 |
|------------------------------------------------------------------------|------------------------------|------------------------------------|
| Total Incidence<br>- per 100,000<br>py[ 95% CI]                        | 1.37 [0.87-1.99]             | 1.02 [0.62 –<br>1.60]              |
| Indigenous<br>Incidence<br>- per 100,000<br>py[ 95% CI]                | 2.47 [1.28-4.31]             | 1.85 [0.85 –<br>3.51]              |
| Non-Indigenous<br>Incidence<br>- per 100,000<br>py[ 95% CI]            | 0.95 [0.50-1.62]             | 0.73 [0.35 –<br>1.34]              |
| Rate Ratio<br>Indigenous vs<br>Non-Indigenous<br>incidence<br>[95% CI] | 2.60 [1.19-5.70]<br>p= 0.017 | 2.53<br>[1.03 to 6.24]<br>p= 0.043 |

449

450

451

452

453

454

455

456

457 Figure 1: Incidence of syphilis in the Top End of the Northern Territory by Indigenous status;  
458 2006-2016.

459 Figure 2: Inclusion workflow for cohort

460

461 Figure 3: Clinical Syndromes and overlap

462

463 Figure 4 Evaluation of patient cohort with different diagnostic criteria.

464 Footnote: The percentage of Probable cases decreases from 64% to 40% respectively. The  
465 Category of not NS subsequently increases to 24% respectively.

466

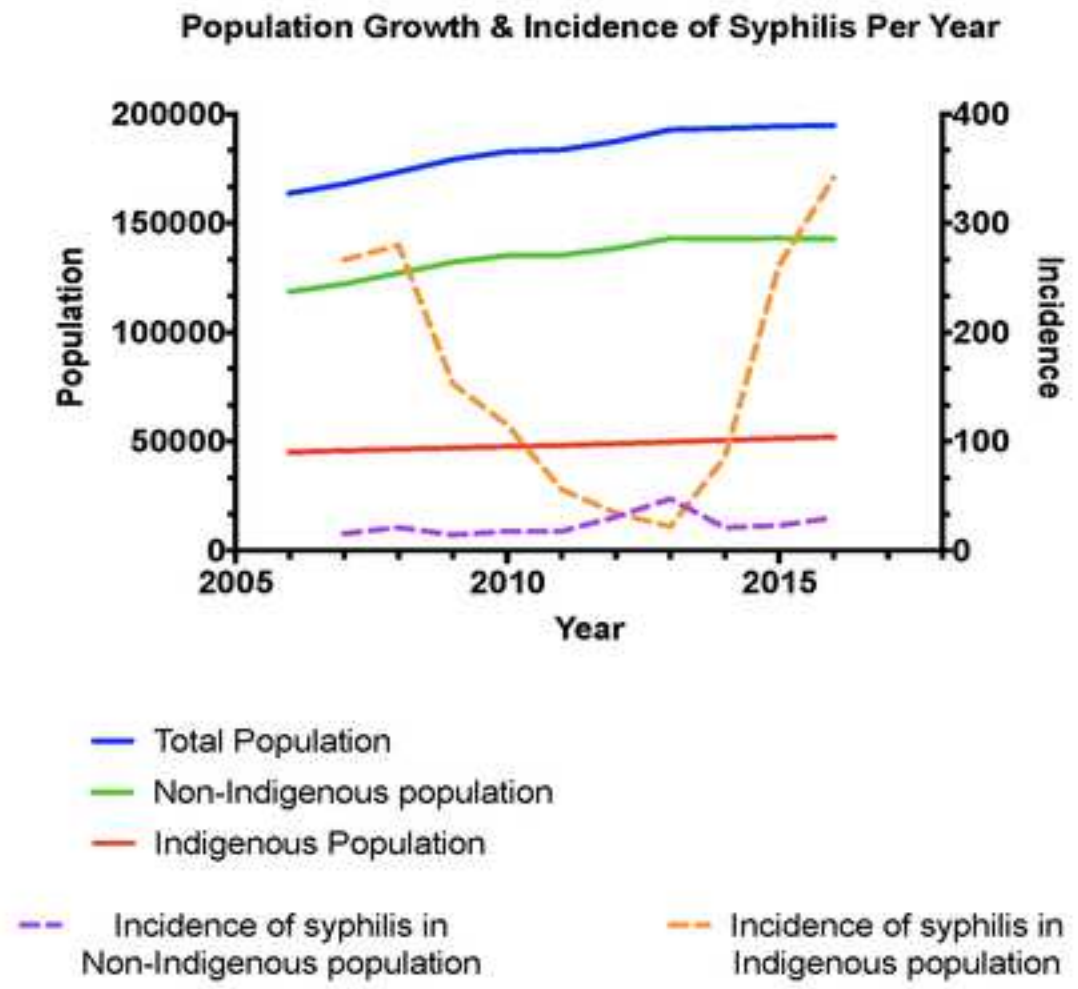

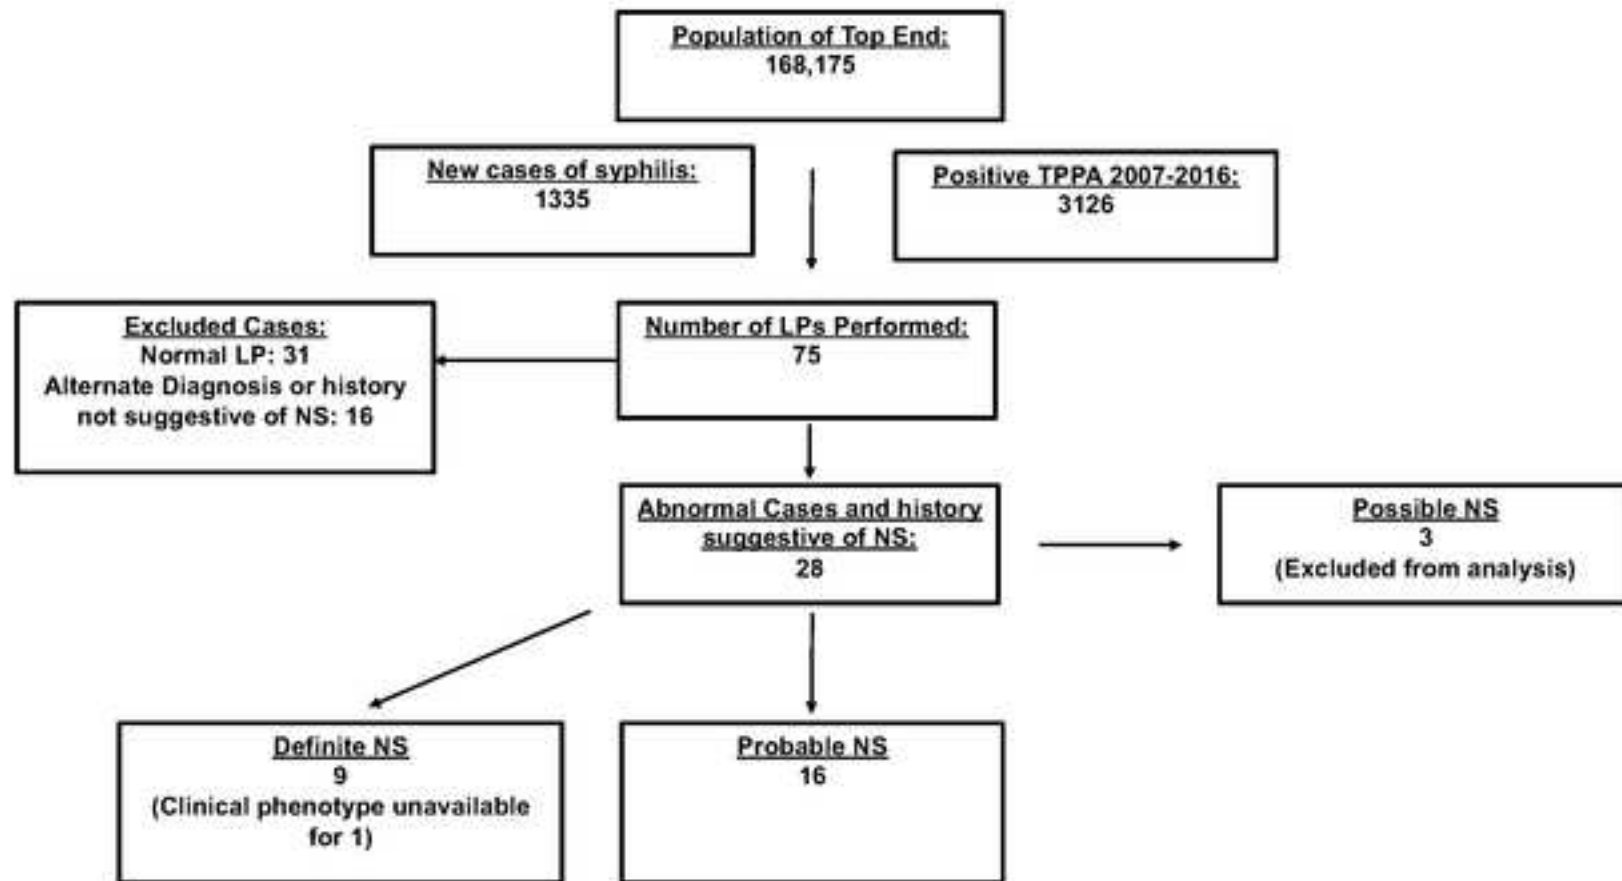



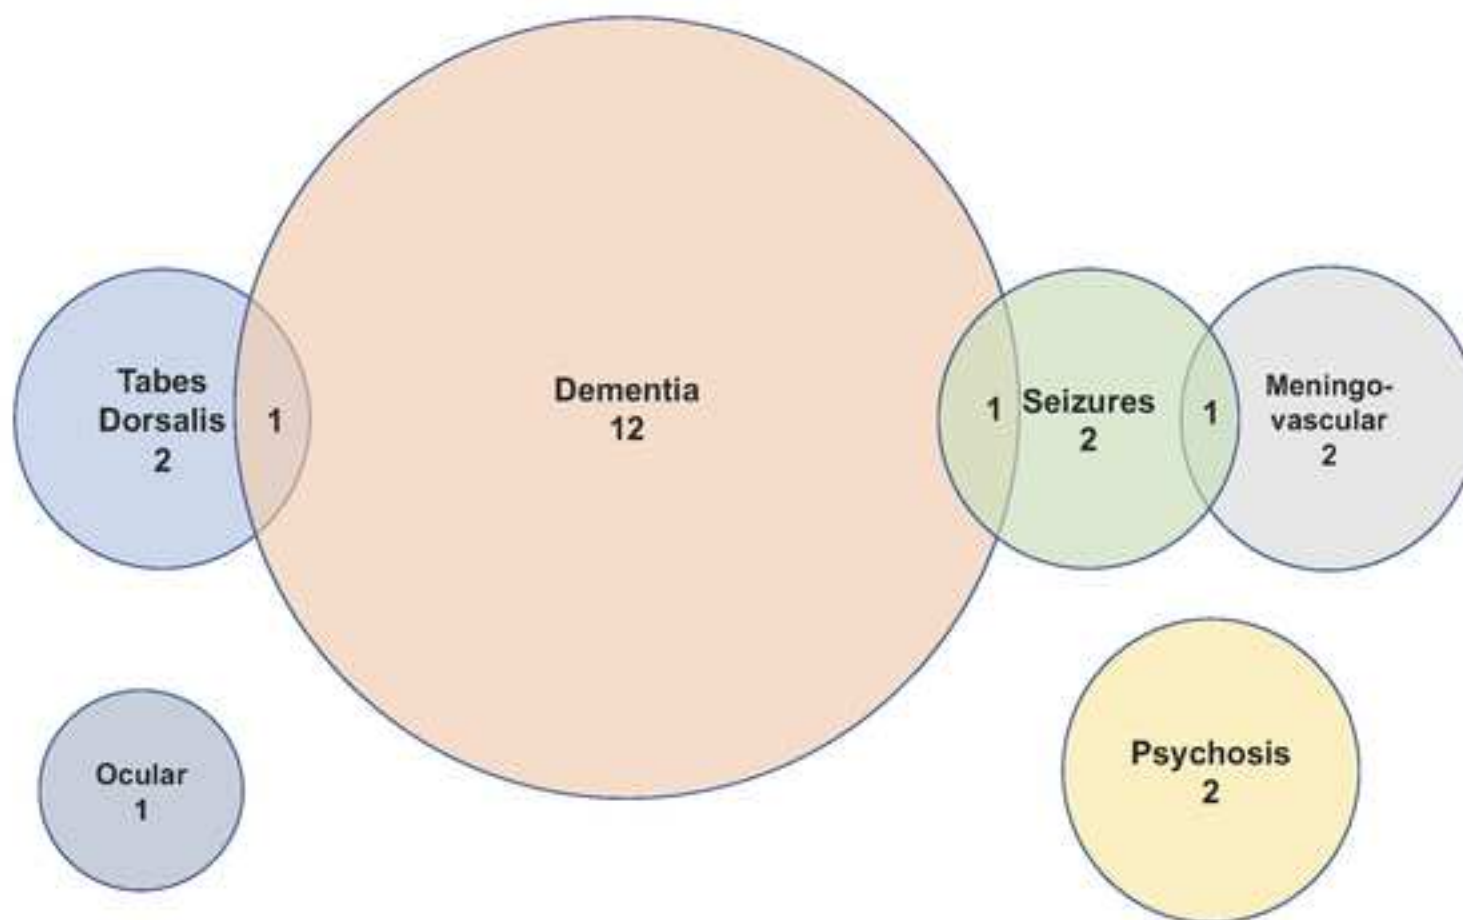

## The use of different criteria for NS Diagnosis

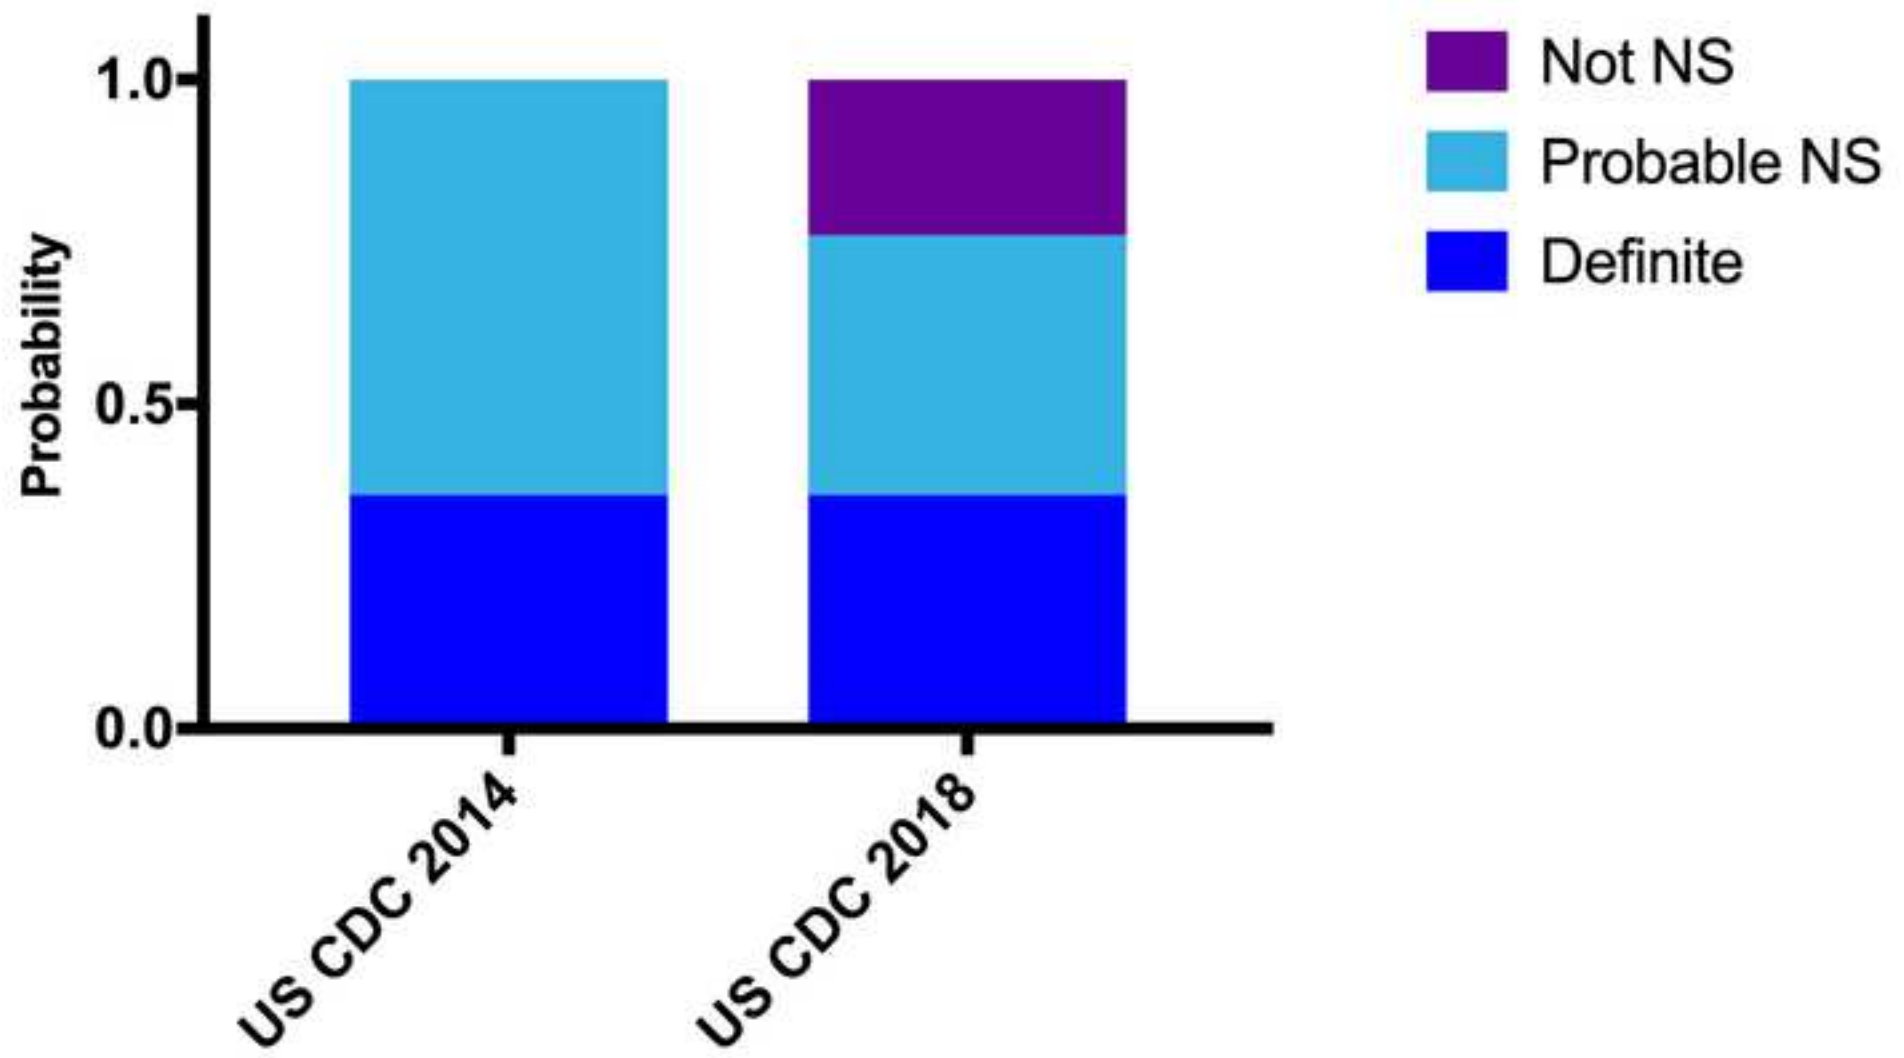

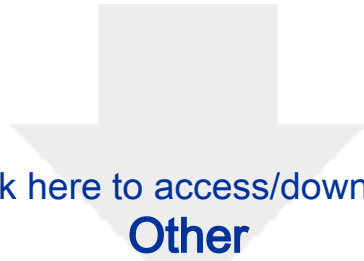

Click here to access/download

**Other**

Sup\_tables\_submission.docx

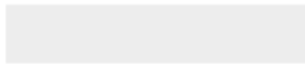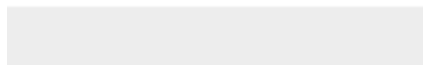

1                    **Neurosyphilis: Still Prevalent and Overlooked in an At Risk Population**

2    **Authors**

3    Prashanth S Ramachandran <sup>1</sup>

4    Rob W Baird<sup>2</sup>

5    Peter Markey<sup>1,3</sup>

6    Sally Singleton<sup>3</sup>

7    Michael Lowe<sup>1</sup>

8    Bart J Currie<sup>1,4</sup>

9    James N Burrow <sup>1</sup>

10   Ric N Price <sup>1,4,5</sup>

11

12    1 Division of Medicine, Royal Darwin Hospital, Darwin, NT, Australia;

13    2 Territory Pathology, Department of Health, Darwin NT.

14    3 Centre for Disease Control, Northern Territory, Australia

15    4 Global and Tropical Health Division, Menzies School of Health Research, Charles Darwin

16    University, Darwin, NT, Australia;

17    5 Centre for Tropical Medicine and Global Health, Nuffield Department of Medicine, University

18    of Oxford, Oxford, UK

19

20    **Keywords:** Neurosyphilis, Syphilis, Epidemiology

21

22    **Corresponding Author:**

23    Ric N Price

24    Global and Tropical Health Division, Menzies School of Health Research, Charles Darwin

25    University, Darwin, NT, Australia;

26    Centre for Tropical Medicine and Global Health, Nuffield Department of Medicine, University

27 Email: [Ric.Price@menzies.edu.au](mailto:Ric.Price@menzies.edu.au)

28 **Alternate Corresponding Author:**

29 Prashanth S Ramachandran

30 Division of Medicine, Royal Darwin Hospital, Darwin, NT, Australia

31 Email: [prashanth.ramachandran@ucsf.edu](mailto:prashanth.ramachandran@ucsf.edu)

32

33 **Article Summary:**

34 ~~There is currently a syphilis outbreak in Northern Australia.~~ We assessed the incidence of  
35 neurosyphilis (NS) in ~~There is currently a syphilis outbreak in Northern Australia,~~ [where there is](#)  
36 [currently an outbreak of syphilis\\_ this region.](#) There was a higher incidence of NS in the  
37 Indigenous population using both the US-CDC 2014 criteria and the recent 2018 US-CDC  
38 criteria. [Neurosyphilis was underdiagnosed and undertreated by clinicianby clinicians.](#)

39

40

41

42

43

44

45

46

47

**Commented [JB1]:** I don't know if this is the way to state the important message of the paper?

**Formatted:** Font: Not Bold, No underline, English (United States)

48

49

50 **Abstract**

51 **Background:** Neurosyphilis (NS) ~~can~~ presents with a variety of clinical syndromes that can and  
52 may be attributed to other aetiologies due to difficulties in its diagnosis. We reviewed all cases  
53 of NS from the “Top End” of the Australian Northern Territory over a ten-year period to assess  
54 incidence, clinical and laboratory manifestations.

55 **Methods:** Patient data (2007-2016) were extracted from hospital records, centralised laboratory  
56 data and Northern Territory Centre for Disease Control records. Clinical records of patients with  
57 clinically suspected NS were reviewed. A diagnosis of NS was made based on the 2014 US  
58 CDC criteria. Results were also recategorized based on the 2018 US CDC criteria.

59 **Results:** The population of the “Top End” is 185,570, of whom 26.2% we are Indigenous. A  
60 positive TPPA was recorded in 3126 individuals. A total of 75 (2.4%) of TPPA positive patients  
61 had a lumbar puncture (LP), of whom 25 (35%) were diagnosed with NS (9 definite, 16  
62 probable). Dementia was the most common manifestation (58.3%), followed by epilepsy  
63 (16.7%), psychosis (12.5%), tabes dorsalis (12.5%) and meningovascular syphilis (8.3%). 63%  
64 of probable NS cases were not treated appropriately due to a negative CSF VDRL. Despite  
65 increased specificity of the 2018 US CDC criteria, 70% of patient in the probable NS group were  
66 not treated appropriately. -The overall annual incidence [95%CI] of NS was 2.47[1.28–4.31] per  
67 100 000py in the Indigenous population and 0.95[0.50–1.62] in the non-Indigenous population  
68 (rate ratio=2.60 [1.19–5.70];p= 0.017).

69 **Conclusion:** Neurosyphilis is frequently reported in the NT, particularly in Indigenous  
70 populations. Disturbingly, ~~nearly~~ 60% of probable neurosyphilis patients based on the 2014  
71 criteria, and 70% based on the 2018 criteria with ~~probable neurosyphilis~~ were not treated

72 appropriately. ~~because of over-reliance on CSF VDRL positivity. It is critical that clinicians~~  
73 ~~should be aware of the diagnosis of NS and treat patients appropriately.~~

74

75

76

77

78

79

## 80 **Introduction**

81 Syphilis continues to cause a major burden of disease due to its systemic manifestations and  
82 long-term neurological sequelae. After the introduction of contact tracing, followed by penicillin,  
83 the incidence of syphilis declined significantly, falling from 447 per 100 000-person years (py) in  
84 the United States in 1947 to 11.2 per 100 000py in 2000(1, 2). However since the turn of the  
85 millennium, the global incidence has increased markedly, more than doubling in at risk  
86 populations in North America, Australia and Europe (1, 3, 4). In 2014 alone there were an  
87 estimated 6 million new cases of syphilis (5) the majority occurring in Africa and South East  
88 Asia(6). The risk of syphilis is expected to be particularly high in certain ethnic groups,  
89 indigenous populations and men having sex with men(7).

90 Many countries have instituted mandatory reporting of all new cases of syphilis, to ensure early  
91 detection of outbreaks and to guide patient management and public health interventions.  
92 However, neurosyphilis (NS) is not a reportable disease as a separate entity and therefore  
93 epidemiological data are sparse. In the antibiotic era, several studies have estimated the  
94 incidence of NS to range from 0.08 to 2.2 per 100 000py(8-11). However, the true incidence of  
95 NS is difficult to quantify due to frequent misdiagnoses, arising from a paucity of accurate

Formatted: Space After: 7.5 pt, Line spacing: Double,  
Pattern: Clear (White)

96 microbiological tests, protean manifestations of the disease and varied clinical diagnostic  
97 criteria(12, 13).

98 In the tropical northern region of the Northern Territory (NT) of Australia (the “Top End”), which  
99 has had a centralised syphilis register and programmatic support since 2005, syphilis rates had  
100 been decreasing until 2013. However, in 2011 an epidemic of syphilis commenced in the State  
101 of Queensland which soon spread eastward to Central Australia, then the Top End of the  
102 Northern Territory by mid 2013 and subsequently to Western Australia. The tri-State epidemic  
103 continues in 2020. To quantify the impact of NS on the region, we undertook a review of all  
104 cases of NS from the “Top End” over a ten-year period (2007-2016) to assess its incidence and  
105 associated clinical and laboratory manifestations.

106

## 107 **Methods**

### 108 **Study Design**

109 We conducted a retrospective (2007 – 2015) and prospective (2016) multicentre cohort study of  
110 NS, in the Top End of the Northern Territory of Australia. In 2007 the population of the ‘Top End’  
111 was 168,036 rising to 194,882 in 2016. The corresponding Indigenous population rose from  
112 45,765 (27.2% of population), to 52,101 (26.7% of population). The population at the midpoint  
113 of the ten-year study period was 185,570, of whom 48,632 (26.2%) were Indigenous. The  
114 midpoint population over the ten-year period was used for incidence calculations.

115

116 Between 2007 and 2016, all patients presenting to one of the three district hospitals servicing this  
117 region were eligible for inclusion in the study if they fulfilled the US Centres for Disease Control  
118 (US CDC) criteria for NS, comprising of a clinical syndrome consistent with NS and cerebrospinal  
119 fluid (CSF) changes(14). Our initial analysis was based on the 2014 US CDC criteria for NS,



120 which has a high sensitivity, allowing the capture of all cases, however, these criteria lack  
121 specificity, most notably when serological tests are negative (15). The revised 2018 US CDC NS  
122 criteria were published during manuscript preparation and were included into subsequent  
123 epidemiological analysis (Table 1)(16).

124 Clinical syndromes consistent with NS were defined as meningitis with or without cranial nerve  
125 abnormalities, meningovascular disease, dementia (general paresis) and tabes dorsalis, and  
126 isolated presentations of epilepsy, psychosis, ocular and otic disease. Late manifestations of NS  
127 were categorized as dementia, tabes dorsalis and psychosis. Early manifestations of NS were  
128 categorized as meningitis, meningovascular disease, ocular disease, otic disease and isolated  
129 epilepsy. As per the US CDC 2014 NS criteria, a definite diagnosis of NS was defined as at least  
130 one clinical syndrome compatible with NS with a positive serum Treponema pallidum particle  
131 agglutination assay (TPPA) test and a positive CSF Venereal Disease Research Laboratory  
132 (VDRL). Probable NS was defined as a clinical syndrome suggestive of NS, a positive serum  
133 TPPA test, an elevated CSF white cell count (WCC) >5 cell/microL and/or CSF protein >0.45mg/L  
134 with no other cause found (Table 2). Possible NS was defined as a patient who was treated for  
135 NS due to high suspicion, but who did not meet CDC criteria for lack of a CSF examination, or a  
136 diagnosis based on an alternate criterion.

137 CSF treponemal tests (TPPA, FTA-Ab) is not included in either the 2014 or 2018 CDC criteria.  
138 The test carries a high sensitivity but ~~low~~ specificity, and is often used to rule out NS when  
139 negative. However due to its poor negative predictive value, some argue that it should not be  
140 used when a patient's pre-test probability of NS is high (17). We did not use either CSF TPPA or  
141 FTA-Ab in our selection criteria as it was not part of the US CDC 2014 criteria.

142

#### 143 **Data sources**

144 Patients were identified and matched using three separate databases; i) The Northern Territory  
145 (NT) Centre for Disease Control notifications of syphilis, including classification (either less than

146 2 years duration or greater than 2 years or unknown duration) and register of prior treatment; ii)  
147 Hospital discharge coding from each of the three district hospitals; and iii) laboratory records of  
148 syphilis serology testing.

149 Demographic and clinical information from all eligible patients were gathered from the electronic  
150 medical records and the clinical classification of NS, its treatment and outcomes recorded in a  
151 standardised database using Excel (v16.19, Microsoft). Patients' hardcopy medical records were  
152 retrieved when further information was required. Regional population data were obtained from the  
153 Top End Health Department data which maintains yearly Indigenous and Non-Indigenous  
154 population data for the region. NT CDC data was used for confirmation of treatment history and  
155 serological titre response. NT CDC data for new cases of syphilis were divided into three  
156 categories during collection: Indigenous, non-Indigenous and unknown.

157 The Top End syphilis diagnostic algorithm uses serum TPPA treponemal testing as the initial test  
158 for syphilis and if positive, an RPR is done. CSF for suspected NS patients is analysed by VDRL,  
159 TPPA and FTA-A alongside biochemistry analysis and microscopy.

160

#### 161 **Statistical analysis**

162 All statistical analyses and graphs were generated using Graphpad Prism(v7, San Diego,  
163 California). Normally distributed data were compared using Student's t-test, and non-parametric  
164 comparisons were made using the Mann-Whitney U test. Proportions were examined using  $\chi^2$   
165 with Yates' correction or Fisher's exact test. Correlations were assessed using the Pearson test  
166 for correlated proportions for normal distributed variables and the Spearman rank test for non-  
167 normal distributed variables. Rate ratios and 95% confidence intervals were determined using  
168 Confidence Interval Analysis (vs 2.2.0).

#### 169 **Ethics**

170 Ethical approval was granted by the Human Research Ethics Committee of the Northern Territory  
171 Department of Health and Menzies School of Health Research (HREC 2016-2633)

172

### 173 **Results**

174 Between January 2007 and December 2016, 3126 (1.6%) individuals in the Top End tested for  
175 syphilis serology were TPPA positive. Of these there were 1135 confirmed new cases of syphilis  
176 (Figure 1), of whom 789 (69.5%) were in Indigenous, 330 (29%) in non-Indigenous individuals  
177 and 18 (1.5%) had no classification available. The corresponding incidence of new cases of  
178 syphilis was 162.24 per 100,000 person years (py) [95% CI 151.12 - 173.97] in the Indigenous  
179 population and 24.10 per 100,000py [95% CI 21.57 – 26.85] in the non-Indigenous population  
180 (Rate Ratio (RR) = 6.73 [95%CI 5.92 – 7.65];  $p < 0.0001$ ). The number of new cases rose from a  
181 mean of 105.8 per year between 2007 and 2011 to 121.2 per year between 2012 and 2016. The  
182 overall incidence of newly diagnosed syphilis cases was 61.16 [95% CI 57.66 – 64.83] per  
183 100,000py.

184

### 185 **Neurosyphilis**

186 Of the 3126 TPPA positive individuals, 75 (2.4%) underwent lumbar puncture. Of the 44 (59%)  
187 patients with CSF abnormalities, 16/44 (31%) had an alternate diagnosis or a history that was  
188 not suggestive of NS. Of the remaining 28 patients with clinical history consistent with NS 9  
189 (32%) had a definite diagnosis of NS, 16 (57%) had a probable diagnosis of NS and 3 (11%)  
190 had possible NS. The nineteen patients with alternate diagnosis and possible NS were excluded  
191 from further analysis (Figure 2).

192 Of the 25 patients with definite or probable NS, 19 (76%) were male, 12 (48%) were Indigenous  
193 and 2(8%) were HIV positive. The median age of these patients was 64 years (range: 32 to 97).

194 The overall incidence of definite or probable NS was 1.37 [95% CI 0.87 – 1.99] per 100,000py ,  
195 the incidence being 2.47 [95%CI 1.28 – 4.31] per 100 000py in the Indigenous population and  
196 0.95 [95%CI 0.50 – 1.62] per 100,000py in the non-Indigenous population (rate ratio=2.60 [1.19  
197 – 5.70]; p= 0.017). When only patients with definite NS were included, the incidence was 0.49  
198 [95% CI 0.22 – 0.92] per 100,000py, with no significant difference between the Indigenous (0.62  
199 [95% CI 0.13 – 1.80] per 100,000py) and non-Indigenous (0.44 [95% CI 0.16 – 0.95] per  
200 100,000py) populations p=0.63. The rate of NS per case of syphilis in the Indigenous population  
201 was 12/789 (1.52%) and 13/330 (3.6%) (rate ratio=0.39 [0.18 – 0.84]; p=0.016).

### 202 **Clinical Manifestations**

203 Clinical data were available for 24 of the 25 patients with definite or probable NS. Dementia was  
204 present in 14 (58.3%) of patients, seizures in 4 (16.7%), tabes dorsalis in 3 (12.5%), psychosis  
205 in 3 (12.5%), meningovascular disease in 2 (8.3%) and ocular involvement (panuveitis) in 1  
206 (4.2%) patient. Three patients had more than one clinical manifestation of NS; Figure 3 and  
207 Table 2. There were no cases of meningitis or otic NS. It was not possible to characterise the  
208 dementia syndrome or severity from the clinical records. Overall ~~19/24~~ 79% (19/24) cases were  
209 late manifestations of NS and ~~5/8~~ 62% (5/8) of definite cases were late manifestations of the  
210 disease. ~~There were n~~No patients with ~~cases of~~ asymptomatic NS were identified.

### 211 **Laboratory results**

212 CSF VDRL was positive in all cases of definite NS and absent otherwise. CSF TPPA was  
213 positive in 89% (8/9) of those with definite NS and 18.8% (3/16) with probable NS. CSF FTA  
214 was only tested in 20 patients and was positive in all (8/8) patients with a definite diagnosis and  
215 33% (4/12) of patients with a probable diagnosis. Only 2 patients in the probable group had  
216 positive CSF serology for both TPPA and FTA (Table 2).

217 In total 28.0% (7/25) patients with definite or probable NS had a raised WCC in their CSF with a  
218 median count of 21 cell/microL (range 7 to 45 cell/microL), which was predominantly  
219 lymphocytic. In patients with a definite NS diagnosis WCC was elevated in 55.6% (5/9) of  
220 cases, compared to 12.5% (2/16) in patients with a probable diagnosis ; p= 0.144. The CSF  
221 protein was elevated in 92% (24/25) of patients (median 0.74 mg/L, range 0.49-1.37mg/L).

222 Two patients with definite NS had borderline CSF results: with a CSF protein of 0.49mg/L and  
223 0.5mg/L respectively with no pleocytosis. One patient with definite NS had a normal CSF protein  
224 with CSF WCC of 5 cell/microL which should be considered as a normal CSF. Two of these  
225 patients had dementia, there were no clinical data available for the third.

226 Serum RPR was reactive in all (9/9) patients with a definite diagnosis of NS and 62.5% (10/16)  
227 of those with a probable diagnosis, with a significantly higher titre in those with definite NS;  
228 p<0.0001 (Table 2).

229

### 230 **Treatment**

231 Prior to a diagnosis of NS, two patients with definite NS had been treated for late latent syphilis  
232 with intramuscular benzathine penicillin without a pertinent four-fold decrease in their RPR. Nine  
233 (56.3%) of the patients with probable NS had also received prior intramuscular benzathine  
234 penicillin for latent syphilis of whom 4 (44.4%) did not have an appropriate four-fold decrease in  
235 their RPR titre. This can be attributed to either treatment failure or potential re-infection. Of the 6  
236 patients in the probable group who had a non-reactive serum RPR at the time of NS diagnosis,  
237 data regarding prior treatment through the NT CDC was available for only 5. Of those 5 patients,  
238 3 had no documented prior history of treatment for syphilis

239 All patients with definitive NS were treated with the recommended regimen of 14-15 days of IV  
240 benzylpenicillin, but only 37.5% (6/16) of those with probable NS were treated with IV benzyl

241 penicillin. Of the 10 patients who were not treated appropriately, four were treated for late latent  
242 syphilis (weekly IM benzathine penicillin for 3 weeks), three of whom had dementia with the only  
243 mildly elevated CSF protein (range 0.57-0.74 mg/L). One patient treated for latent syphilis had  
244 signs and symptoms of tabes dorsalis and a CSF WCC 21 cell/microL and a negative CSF  
245 VDRL.

246 Only 2 of the 25 patients with definite or probable NS had a repeat lumbar puncture, one of  
247 whom was a 60-year-old who had presented with psychosis and received appropriate therapy  
248 for NS, but subsequently required re-treatment as there was still an elevated CSF VDRL without  
249 a 4 fold decrease.

## 250 **Discussion**

251 Despite significant public health endeavours, syphilis continues to increase in incidence and  
252 exert significant morbidity in at risk populations. Our analysis highlights that between 2007 and  
253 2016, the incidence of syphilis in the Top End of Australia was 61.16 per 100,000 py with an  
254 associated incidence of NS, based on the 2014 US CDC criteria, of 1.37 per 100,000 py. The  
255 rate of syphilis was almost 7-fold higher in the Indigenous population than in the non-Indigenous  
256 population and this was associated with a 2.5 fold higher rate of NS. However, the rate of NS  
257 per case of syphilis was significantly lower in the Indigenous population in comparison. This is  
258 likely due to the stringent follow up and treatment by the NT CDC of Indigenous cases  
259 compared to non-Indigenous cases. This has likely limited the duration of syphilis exposure in  
260 this community and prevented the development of NS.

261 Since two thirds of the cases were defined as probable diagnoses we may have overestimated  
262 the true risk of NS however even when these patients were excluded the incidence of definitive  
263 NS in the Top End was 0.49 per 100,000py, approximately 2.5 - 5 fold higher than that reported  
264 from UK and Denmark. ~~However w~~We may also ~~There is also a risk that we have~~

265 underestimated the true incidence. Our methodology screened ~~for~~ patients based on those who  
266 ~~underwent received~~ lumbar punctures, all of whom had presented with neurological symptoms.  
267 This approach ~~method would have failed~~ to capture asymptomatic NS patients, and thus  
268 ~~underestimated~~ underestimated the true incidence ~~which would have led to higher incidence~~  
269 ~~numbers~~. It is not current practice to ~~perform obtain~~ an LP for patients with syphilis who do not  
270 ~~have fail to have an appropriate~~ a four-fold decline in serum RPR despite adequate treatment  
271 and this may have ~~therefore our~~ missed capture of detection of asymptomatic cases ~~may not~~  
272 ~~be complete~~. Unless all cases of syphilis are tested for NS, regardless of neurological  
273 ~~symptoms, we would not be able to truly gauge the real incidence of the disease~~. Our proposed  
274 incidence of NS also assumes that clinicians have considered ~~correctly queried~~ the diagnosis of  
275 NS in all patients presenting with suspicious symptoms and sent appropriate testing, ~~which may~~  
276 ~~not always be the case~~.

Commented [RP2]: Obvious – is this really needed?

277  
278 -In view of the rising number of cases of early syphilis it is likely that NS will increase over the  
279 coming decades. Our study is unique in applying almost complete capture of reported cases  
280 from the region. It is also the first study to detail the incidence and clinical characteristics of NS  
281 in any region of Australia. Similar to previous studies in the US that demonstrate racial  
282 disparities with the rates of syphilis between Whites, Blacks and Hispanic persons, our study  
283 demonstrates marked ethnic disparities in the incidence of both syphilis and neurosyphilis (7,  
284 18), which further undermines the already poor health outcomes and lower life expectancy of  
285 Indigenous Australians.(18)

286 The diagnosis of NS is challenging, since there is no gold standard microbiological assay and  
287 varying, non-specific diagnostic criteria. Alarmingly more than half of the patients in our study  
288 with a probable diagnosis of NS did not receive appropriate treatment. Both false negative and  
289 false positive diagnoses contribute to the misdiagnosis of NS. The former arises from the

290 misconception that a negative CSF VDRL has a high negative predictive value for ruling out NS.  
291 Whilst CSF VDRL is highly specific, its sensitivity is between (30 and 70%)(19). A negative CSF  
292 VDRL should therefore not dissuade a clinician from the potential diagnosis of NS. Although  
293 CSF treponemal tests have higher sensitivity, their negative predictive value is dependent on  
294 the pre-test probability of NS(17). The high prevalence of syphilis in the Top End and the high  
295 level of suspicion prompting an LP and investigation for NS increases the pre-test probability of  
296 NS in our cohort. In this context a negative CSF treponemal test cannot be relied upon to rule  
297 out NS. Although polymerase chain reaction (PCR) carries a high sensitivity and specificity for  
298 other specific neuroinfectious diseases (HSV, enterovirus, etc), the utility of PCR has never  
299 been shown for NS (20).

300 False positive diagnoses of NS can arise from the low specificity and high sensitivity of the US  
301 CDC 2014 diagnostic criteria, in which the only CSF abnormality required for a diagnosis of NS  
302 is an elevated CSF protein. US CDC Guidelines recommend that NS should be treated with  
303 intravenous benzylpenicillin administered 4 hourly for 15 days(14). We conjecture that there is  
304 either a reluctance to treat an already very demented patient or ambivalence over the  
305 significance of a mildly elevated protein as the only abnormal CSF finding. The clinical  
306 experience of many clinicians is that a mildly elevated CSF protein (0.46-0.55 mg/L) as an  
307 isolated finding is of little clinical utility.(21) We were unable to extract ~~did not have data on the~~  
308 cognitive profile of our patients with dementia and it is therefore not possible ~~difficult to clearly to~~  
309 differentiate between patients with ~~in the probable NS group~~ who truly had dementia related to  
310 NS or due to another ~~aetiology~~ ~~common cause of dementia~~. Given the increasing prevalence of  
311 dementia in the general community, the treating clinicians may have decided not to treat for  
312 probable NS as another cause of dementia was more likely.

313 During the preparation of the manuscript, the US CDC released revised diagnostic criteria which  
314 included an additional requirement that a reactive serum RPR result was needed for a diagnosis



315 of definite and probable NS. A four-fold decrease in RPR titres suggests a treatment response  
316 in syphilis, however RPR titres can fall and normalise even without treatment. Previous studies  
317 have demonstrated that in patients with definite NS, the serum RPR is almost always reactive,  
318 but approximately 10% of patients with probable NS have a non-reactive serum RPR(22). In our  
319 cohort all patients with definite NS had a reactive serum RPR, but over a third of patients with  
320 probable NS group did not have a reactive serum, of whom three had no history of prior syphilis  
321 treatment and only had an elevated CSF protein. According to more stringent criteria these  
322 serum RPR negative patients would be considered false positives. Although some of these  
323 patients may have been correctly categorized as not having NS, the diagnosis in those who  
324 have never received any form of prior syphilis treatment is unclear – they could have potentially  
325 normalised serum RPR overtime and thus constitute false negative diagnosis of NS. This group  
326 is likely to constitute a very small overall percentage of NS cases and a drop in the US CDC  
327 2018 criteria's sensitivity may be appropriate for the compensatory increase in specificity. The  
328 US CDC 2018 criteria does demonstrate that a large number that were previously categorized  
329 as probable NS with only an elevated CSF protein, likely did not have NS as they were no  
330 longer considered probable under the new criteria. We recategorized our cohort into both the  
331 2014 and 2018 NS criteria, (Figure 4, Supplementary file 1) to demonstrate the differences in  
332 incidence between the two criteria. Interestingly wWith the new 2018 CDC NS criteria, only 3/10

333 (30%) of probable NS cases were treated appropriately with IV benzylpenicillin for 2 weeks. 3  
334 patients received 3 courses of IM benzathine penicillin and the remainder of patients received  
335 no treatment.

336 Our study has several There are several limitations of our study. Although weWe have  
337 attempted to capture all cases of syphilis and NS in a specified region as accurately as possible  
338 through searching multiple databases, however it is possible that given the uncertainty of the  
339 diagnosis the risk of over or underestimation remains an issue given the complexity of the

Commented [RP3]: I think this should be in the Results and also the abstract. It's the key take home message of underestimating NS

Commented [JB4R3]: Agree

340 ~~disease, and our reliance on LP and appropriate clinical suspicion, we may have either over- or~~  
341 ~~under- estimated the true burden of disease-. Furthermore whilst we included prospective data~~  
342 ~~collection~~ ~~collection~~ ~~the majority of the data were gathered~~ ~~Though this was a retrospectively~~  
343 ~~and prospective study, a large portion was conducted retrospectively, and we were~~ ~~We were~~  
344 ~~not unable to document detailed phenotypes of many of the patients from simply through the~~  
345 ~~medical notes, which would have helped strengthen our understanding of the disease is the Top~~  
346 ~~End.~~

347

## 348 **Conclusion**

349 Our study highlights the ongoing difficulties with the diagnosis and management of NS. Despite  
350 these challenges, there continues to be significant disparities between Indigenous and non-  
351 Indigenous Australians in the incidence of syphilis and NS. Similar to other studies, the key  
352 dilemma is whether patients with probable NS truly have the disease and would benefit from  
353 appropriate treatment (23). Until the advent of a new and accurate assay, NS will continue to be  
354 a complex and difficult disease to diagnoses and manage. ~~A large proportion of patients with~~  
355 ~~probable NS were not diagnosed or treated appropriately. Whilst~~ ~~The the new 2018 CDC NS~~  
356 ~~criteria does improves the specificity of probable NS, it is critical that clinicians should be aware~~  
357 ~~of the diagnosis and treat patients appropriately.~~ ~~which helps remove the ambiguity with a~~  
358 ~~percentage of cases. However, clinicians should not be over reliant on CSF VDRL to make the~~  
359 ~~diagnosis of NS and appropriate treatment should be initiated if patients meet the 2018 CDC~~  
360 ~~Criteria.~~

361

362

363

365 **References**

- 366 1. Center for Disease Control. Sexually Transmitted Disease Surveillance 2017. 2017 [cited 2018  
367 11.17.2018]; Available from: <https://www.cdc.gov/std/stats17/tables/1.htm>.
- 368 2. Green T, Talbot MD, Morton RS. The control of syphilis, a contemporary problem: a historical  
369 perspective. *Sexually Transmitted Infections*. 2001 2001-06-01 00:00:00;77:214-7.
- 370 3. Welfare AGAloHa. incidence of sexually transmissible infections and blood-borne viruses. 2018  
371 [cited 2018 11.17.2018]; Available from: [https://www.aihw.gov.au/reports/australias-health/australias-  
372 health-2018/contents/indicators-of-australias-health/sexually-transmissible-infections-bloodborne-  
373 virus](https://www.aihw.gov.au/reports/australias-health/australias-health-2018/contents/indicators-of-australias-health/sexually-transmissible-infections-bloodborne-virus).
- 374 4. ECDC. European Centre for Disease Prevention and Control. Annual Epidemiological Report 2016  
375 – Syphilis. 2016 [cited 2018 11.17.2018]; Available from:  
376 <http://ecdc.europa.eu/en/healthtopics/Syphilis/Pages/Annual-epidemiological-report.aspx>.
- 377 5. Newman L, Rowley J, Vander Hoorn S, Wijesooriya NS, Unemo M, Low N, et al. Global Estimates  
378 of the Prevalence and Incidence of Four Curable Sexually Transmitted Infections in 2012 Based on  
379 Systematic Review and Global Reporting. *PLoS One*. 2015;10(12):e0143304.
- 380 6. World Health Organization. Global incidence and prevalence of selected curable sexually  
381 transmitted diseases—2008. 2012 [1.3.2018]; Available from:  
382 [http://apps.who.int/iris/bitstream/10665/75181/1/9789241503839\\_eng.pdf?ua=1](http://apps.who.int/iris/bitstream/10665/75181/1/9789241503839_eng.pdf?ua=1).
- 383 7. Center for Disease Control. STDs in Racial and Ethnic Minorities. 2016 [cited 2018 11.17.2018];  
384 Available from: <https://www.cdc.gov/std/stats16/minorities.htm>.
- 385 8. Alani S, Millac P. Neurosyphilis in the Leicester area. *Postgrad Med J*. 1982 Nov;58(685):685-7.
- 386 9. Conde-Sendin MA, Amela-Peris R, Aladro-Benito Y, Maroto AA. Current clinical spectrum of  
387 neurosyphilis in immunocompetent patients. *Eur Neurol*. 2004;52(1):29-35.
- 388 10. Danielsen AG, Weismann K, Jorgensen BB, Heidenheim M, Fugleholm AM. Incidence, clinical  
389 presentation and treatment of neurosyphilis in Denmark 1980-1997. *Acta Derm Venereol*.  
390 2004;84(6):459-62.
- 391 11. Nordenbo AM, Sorensen PS. The incidence and clinical presentation of neurosyphilis in Greater  
392 Copenhagen 1974 through 1978. *Acta Neurol Scand*. 1981 Apr;63(4):237-46.
- 393 12. Tang W, Huang S, Chen L, Yang L, Tucker JD, Zheng H, et al. Late Neurosyphilis and Tertiary  
394 Syphilis in Guangdong Province, China: Results from a Cross-sectional Study. *Sci Rep*. 2017 Mar  
395 24;7:45339.
- 396 13. Yanhua W, Haishan S, Le H, Xiaomei Z, Xinru C, Ling L, et al. Clinical and neuropsychological  
397 characteristics of general paresis misdiagnosed as primary psychiatric disease. *BMC Psychiatry*. 2016 Jul  
398 11;16:230.
- 399 14. Workowski KA, Bolan GA, Centers for Disease C, Prevention. Sexually transmitted diseases  
400 treatment guidelines, 2015. *MMWR Recomm Rep*. 2015 Jun 5;64(RR-03):1-137.
- 401 15. Center for Disease Control. Syphilis (*Treponema pallidum*) 2014 Case Definition. 2019 [cited  
402 2019 05/03/2018]; Available from: [https://wwwn.cdc.gov/nndss/conditions/syphilis/case-  
403 definition/2014/](https://wwwn.cdc.gov/nndss/conditions/syphilis/case-definition/2014/).
- 404 16. Center for Disease Control. Syphilis (*Treponema pallidum*) 2018 Case Definition. 2019. [cited  
405 07/09/2019]; Available from: [https://wwwn.cdc.gov/nndss/conditions/syphilis/case-definition/2018/  
406](https://wwwn.cdc.gov/nndss/conditions/syphilis/case-definition/2018/)
- 407 17. Harding AS, Ghanem KG. The performance of cerebrospinal fluid treponemal-specific antibody  
tests in neurosyphilis: a systematic review. *Sex Transm Dis*. 2012 Apr;39(4):291-7.

- 408 18. Zhao Y, You J, Wright J, Guthridge SL, Lee AH. Health inequity in the Northern Territory,  
409 Australia. *Int J Equity Health*. 2013 Sep 13;12:79.
- 410 19. Hooshmand H, Escobar MR, Kopf SW. Neurosyphilis. A study of 241 patients. *JAMA*. 1972  
411 Feb;219(6):726-9.
- 412 20. Marks M, Lawrence D, Kositz C, Mabey D. Diagnostic performance of PCR assays for the  
413 diagnosis of neurosyphilis: a systematic review. *Sex Transm Infect*. 2018 Jul 30.
- 414 21. Breiner A, Moher D, Brooks J, Cheng W, Hegen H, Deisenhammer F, et al. Adult CSF total protein  
415 upper reference limits should be age-partitioned and significantly higher than 0.45 g/L: a systematic  
416 review. *J Neurol*. 2019 Jan 8.
- 417 22. Tuddenham S, Obeng C, Ghanem KG. Neurosyphilis and ophthalmic syphilis in persons with  
418 negative rapid plasma reagin and positive treponemal antibody test results. *Sex Transm Dis*. 2015  
419 Jun;42(6):347-9.
- 420 23. Vanhaecke C, Grange P, Benhaddou N, Blanche P, Salmon D, Parize P, et al. Clinical and  
421 Biological Characteristics of 40 Patients With Neurosyphilis and Evaluation of *Treponema pallidum*  
422 Nested Polymerase Chain Reaction in Cerebrospinal Fluid Samples. *Clin Infect Dis*. 2016 Nov  
423 1;63(9):1180-6.

424

425

426

427

428

429

430

431

432

433

434

435

436

437

438

439

440

441 Table 1: Diagnostic Criteria for Neurosyphilis

|                    | <b>US CDC 2014<br/>Diagnostic<br/>Criteria for<br/>NS</b> | <b>US CDC 2018<br/>Diagnostic<br/>Criteria for NS</b> |
|--------------------|-----------------------------------------------------------|-------------------------------------------------------|
| <b>Definite NS</b> | Serum TPPA<br>positive                                    | Serum TPPA<br>positive                                |
|                    | CSF VDRL<br>positive                                      | <b>Serum reactive<br/>RPR</b>                         |
|                    |                                                           | CSF VDRL<br>positive                                  |
|                    |                                                           |                                                       |
| <b>Probable NS</b> |                                                           | <b>Serum reactive<br/>RPR</b>                         |
|                    | Serum TPPA<br>positive                                    | Serum TPPA<br>positive                                |
|                    | CSF WCC > 5<br>cell/microL                                | CSF WCC > 5<br>cell/microL                            |
|                    | or                                                        | or                                                    |
|                    | CSF protein ><br>0.5 mg/L                                 | CSF protein ><br>0.5 mg/L                             |

442

443

444

445

446

447

448

449

450

451

452 Table 2: Clinical and laboratory characteristics based on 2014 US CDC Diagnostic Criteria

453

454

|                                                    | <b>Definite</b>                                    | <b>Probable</b>                               | <b>Total</b>                                         |
|----------------------------------------------------|----------------------------------------------------|-----------------------------------------------|------------------------------------------------------|
|                                                    | 9                                                  | 16                                            | 25                                                   |
| Male                                               | 8                                                  | 11                                            | 19                                                   |
| Indigenous                                         | 3                                                  | 9                                             | 11                                                   |
| HIV                                                | 2                                                  | 0                                             | 2                                                    |
| <b>Clinical Diagnoses</b>                          | n = 8                                              | n = 16                                        | n = 24                                               |
| Meningitis                                         | 0                                                  | 0                                             | 0                                                    |
| Ocular                                             | 1                                                  | 0                                             | 1                                                    |
| Meningovascular                                    | 1                                                  | 1                                             | 2                                                    |
| Dementia                                           | 4                                                  | 10                                            | 14                                                   |
| Psychosis                                          | 1                                                  | 2                                             | 3                                                    |
| Tabes Dorsalis                                     | 1                                                  | 2                                             | 3                                                    |
| Seizures                                           | 2                                                  | 2                                             | 4                                                    |
| <b>Laboratory</b>                                  |                                                    |                                               |                                                      |
| Number of reactive serum RPR                       | 9                                                  | 10                                            | 19                                                   |
| Median RPR titre                                   | 1:128 (1:2 - 1:512)                                | 1:4 (1:1 - 1:16)                              | 1:8 (1:1 - 1:512)                                    |
| Number of CSF examinations                         | 9                                                  | 16                                            | 25                                                   |
| Number of positive CSF VDRL ( $\geq$ 1:1)          | 9                                                  | 0                                             | 9                                                    |
| Number of reactive CSF TPPA                        | 8                                                  | 2                                             | 10                                                   |
| Number of reactive CSF FTA                         | 8                                                  | 4                                             | 12                                                   |
| Number with high WCC in CSF (WCC > 5 cell/microL)  | 5<br>(median 26cell/microL, range 7-45cell/microL) | 2<br>(range 10-21cell/microL)                 | 7<br>(median 21 cell/microL, range 7-45 cell/microL) |
| Number with high CSF Protein (Protein > 0.50 mg/L) | 6<br>(median 1.08mg/L, range 0.68-1.37mg/L)        | 16<br>(median 0.725mg/L, range 0.57-1.37mg/L) | 22<br>(median 0.77mg/L, range 0.57-1.37mg/L)         |
| <b>Management</b>                                  | n = 9                                              | n = 16                                        | n = 25                                               |
| Treatment for NS                                   | 9                                                  | 6                                             | 15                                                   |

456

457

458

459 Table 3: Incidence of NS in the NT based on different criteria

460

|                                                                        | <b>US CDC 2014</b>           | <b>US CDC 2018</b>                 |
|------------------------------------------------------------------------|------------------------------|------------------------------------|
| Total Incidence<br>- per 100,000<br>py[ 95% CI]                        | 1.37 [0.87-1.99]             | 1.02 [0.62 –<br>1.60]              |
| Indigenous<br>Incidence<br>- per 100,000<br>py[ 95% CI]                | 2.47 [1.28-4.31]             | 1.85 [0.85 –<br>3.51]              |
| Non-Indigenous<br>Incidence<br>- per 100,000<br>py[ 95% CI]            | 0.95 [0.50-1.62]             | 0.73 [0.35 –<br>1.34]              |
| Rate Ratio<br>Indigenous vs<br>Non-Indigenous<br>incidence<br>[95% CI] | 2.60 [1.19-5.70]<br>p= 0.017 | 2.53<br>[1.03 to 6.24]<br>p= 0.043 |

461

462

463

464

465

466

467

468



469 Figure 1: Incidence of syphilis in the Top End of the Northern Territory by Indigenous status;  
470 2006-2016.

471 Figure 2: Inclusion workflow for cohort

472

473 Figure 3: Clinical Syndromes and overlap

474

475 Figure 4 Evaluation of patient cohort with different diagnostic criteria.

476 Footnote: The percentage of Probable cases decreases from 64% to 40% respectively. The  
477 Category of not NS subsequently increases to 24% respectively.

478

The rate of lumbar puncture was 2.4% - do you know how this compares with other countries ?  
**Thank you for this excellent suggestion. Unfortunately, it is not clear after reviewing the literature what LP rates were in other countries. As we one of our methods of screening for NS patients was by reviewing all LP performed in the region we were able to arrive at those figures. Other studies have either determined NS through chart reviews, referrals to tertiary centers or reporting to their local CDC. These cases have already met criteria for NS. It is unclear from these studies how many patients had an LP for a query of NS but did not met criteria, and therefore not diagnosed with NS.**

Is there a take home message for practicing clinicians, given the low rate of appropriate treatment ?

**We have added a line to the conclusion to try address this. Line 386**

Could you add a line or two telling us what you think the limitations are of your study, please ?

**We have added a paragraph explaining the limitations of the study, including the difficulties in making a definitive diagnosis of NS and our reliance on mostly retrospective data. Line 373**

The authors estimate incidence rates in their population. While they comment on the risk of overestimate in their discussion due to the inclusion of probable cases, they should also comment on the possibility that these are underestimates (at least using the diagnostic criteria that have been employed). Neurosyphilis is often asymptomatic or not considered in the differential diagnosis. Unless the entire population was screened by anti-treponemal antibody, one really does not know the true prevalence of infection.

**We agree that this is an important point. We have now raised the issues in the discussion along with the comments regarding asymptomatic cases. This is on line 280 of the discussion.**

The authors state that the incidence of syphilis declined significantly following the introduction of penicillin. While this is true, contact tracing also played a significant role in the decline in incidence in the U.S. as case rates began falling long before the widespread institution of penicillin.

**Thank you for this addition and something we have now mentioned with appropriate referencing on line 90**

The increased incidence in the indigenous population, presumably individuals in a lower socioeconomic group relative to the white population, parallels the experience in the U.S. where rates of syphilis is substantially higher in the African-American and Hispanic populations.

**Yes, this is indeed true, the Australian Indigenous population are individuals who have a considerably lower socioeconomic background compared to Whites, with poorer health outcomes. We have added an additional line regarding this in our discussion (line 313).**

Two of their patients were HIV-infected. Can they state what percentage of their patients were men who have sex with men among both the indigenous and non-indigenous populations in their study?

**Unfortunately, we do not have that data as it was not consistently or clearly documented in the medical records. It was not available to us from the data provided from the CDC either.**

Were there not any asymptomatic neurosyphilis cases? If not, why not? Also, can the authors identify whether the neurosyphilis manifestations were early or late manifestations of the infection. Whereas dementia, tabes, and psychosis are typically late manifestations (tertiary syphilis), meningitis, seizures and uveitis are often seen with secondary syphilis, particularly, in the HIV infected population.

**There were no cases of asymptomatic NS, which was likely due to our methodology of screening cases based on LPs performed, all of who had neurological symptoms. It also likely relates to the practice of not consistently testing for NS with an LP in patients with syphilis that fail to have a four-fold decrease in RPR despite treatment. There is probably a much higher prevalence of asymptomatic cases that we have failed to detect. This has been added to the discussion (line 282) as well as the results section (line 222). We have categorized cases into early and late manifestations and added it to the results section (line 220), 79% of cases were late manifestations.**

How comfortable are the authors in attributing the neurological manifestations to syphilis? After all, “a man can have as many diseases as he damn well pleases.” If the clinicians caring for these patients felt comfortable that there were better explanations for their neurological manifestations might that not explain why those with “probable neurosyphilis” were not treated?

**This is an excellent point that was raised amongst our group. We have added our thoughts regarding this in the discussion (line 340), specifically around the issue of dementia, which is a common condition in the general population. If the clinician felt that the cause of dementia was due to a more common or likely cause then they may not have treated a diagnosis of probable NS. As we do not have in-depth cognitive testing results on our patient cohort, it is difficult for us to say that there was not another dementing syndrome. Further prospective studies are planned to address this.**

“the test carries a high sensitivity and low sensitivity” (not “now”) line 129

**Thank you, correction made**

How do the authors explain the apparent profound decline in syphilis in the indigenous population between 2007 and 2015 with a nadir in 2013, a year that the incidence in the non-indigenous increased?

The vast majority of cases between 2007-2015 were late latent cases of syphilis in both the Indigenous and non-Indigenous population. These cases were on the decline in the indigenous population, which we believe was in part due to the work by the CDC, though this is difficult to say in retrospect. The small rise in 2013 in the non-indigenous population is in late latent cases as well, though we are not sure why there was a rise. The sharp increase in cases from 2013 onwards are all new cases of syphilis in the Indigenous population, with late latent cases remaining stable in both groups. We have added a table with a breakdown of the raw numbers as a supplementary table for additional clarity.

How does the application of the 2018 CDC criteria change the numbers with respect to the percentage of probably neurosyphilis in which there was a failure to treat?

Thank you for this suggestion as it was not something we had thought to look at. In fact with the 2018 CDC criteria only 3/10 cases received IV BP and 3 cases received IM benzathine. This is less than with the 2014 criteria. We have added these findings to the abstract and discussion section (line 74 & 369).
